# Supplementary material for: Delocalization and geometries in the P-function of thiophosphinic derivatives; Tautomerism and supramolecular interactions
Source: Research Square preprint supplement (doi:10.21203/rs.3.rs-7212964/v1), 2025-07-31
Supplement: Supplementary file 1 [file a520b3f08150d78378b20265.docx]

**Supplementary Information**

**Delocalization and geometries in the P-function of thiophosphinic derivatives; Tautomerism and supramolecular interactions**

Mátyás Czugler*1,2, Zoltán Mucsi3, Józef Drabowicz4,5 and György Keglevich*1

1 Department of Organic Chemistry and Technology, Faculty of Chemical Technology and Biotechnology, Budapest University of Technology and Economics, 1111 Budapest, Műegyetem rkp. 3, Hungary

2 Centre for Structural Science, HUN-REN Research Centre for Natural Sciences, 1117 Budapest, Magyar Tudósok körútja 2, Hungary

3 Faculty of Material and Chemical Sciences, University of Miskolc, 3515 Miskolc, Hungary

4 Institute of Chemistry, Jan Dlugosz University in Czestochowa , 42-200 Czestochowa, Armii Krajowej13/15, Poland

5 Division of Organic Chemistry, Centre of Molecular and Macromolecular Studies, Polish Academy of Sciences, 0-363, Łódź, Sienkiwicza 112, Poland

**Contents**

[1. Data resulting from the searches of X-ray data bases 2](#_Toc203485396)

[2. Theoretical calculations 15](#_Toc203485397)

## 1. Data resulting from the searches in the CSD data base

**Fig. SI-1.** Searches to Table 1. (Summary page and some statistics only)


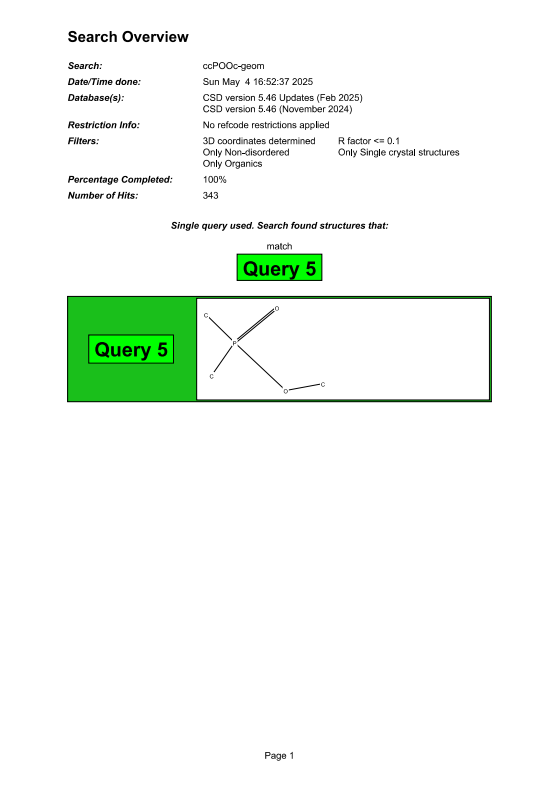


| Name | Count | Mean | Varian | Std.Dev | Mean.Dev | Skew | Kurtos | Min |
| --- | --- | --- | --- | --- | --- | --- | --- | --- |
| ANG1 | 417 | 113.538 | 6.151 | 2.480 | 1.930 | 0.266 | 0.546 | 106.019 |
| ANG2 | 417 | 103.168 | 11.745 | 3.427 | 2.804 | -0.402 | -0.092 | 92.639 |
| ANG3 | 417 | 113.371 | 4.975 | 2.231 | 1.685 | 0.348 | 1.229 | 103.366 |
| ANG4 | 417 | 103.469 | 9.469 | 3.077 | 2.628 | -0.145 | -0.490 | 93.778 |
| ANG5 | 417 | 107.521 | 22.845 | 4.780 | 3.174 | -1.348 | 3.948 | 82.841 |
| ANG6 | 417 | 114.645 | 3.711 | 1.926 | 1.367 | -1.375 | 4.180 | 102.962 |
| DIST1 | 417 | 1.473 | 0.000 | 0.009 | 0.007 | -0.215 | 3.966 | 1.418 |
| DIST2 | 417 | 1.590 | 0.000 | 0.017 | 0.013 | 0.111 | 3.407 | 1.501 |
| DIST3 | 417 | 1.802 | 0.001 | 0.026 | 0.020 | 0.688 | 1.729 | 1.731 |
| DIST4 | 417 | 1.801 | 0.001 | 0.025 | 0.018 | 1.363 | 3.623 | 1.734 |
| R-fact | 417 | 4.976 | 2.723 | 1.650 | 1.340 | 0.726 | 0.014 | 2.13 |

**Fig. SI-2.** Searches to Table 1. (Summary page and some statistics only)


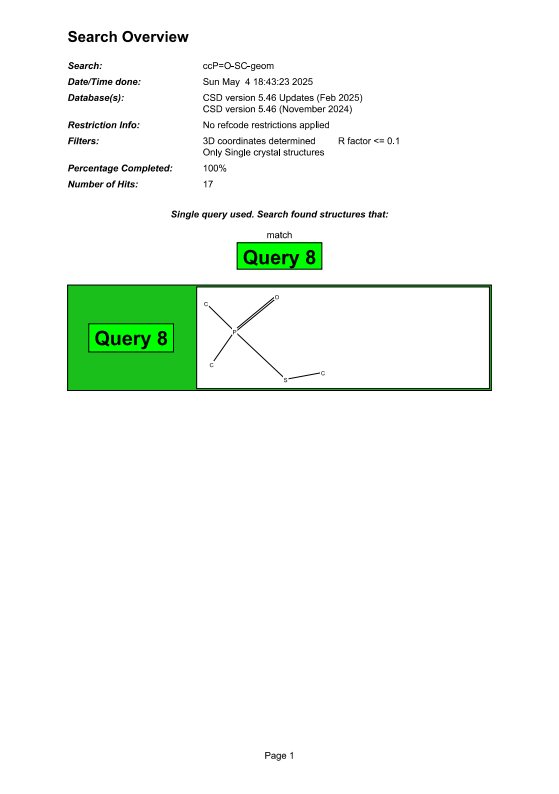


| Name | Count | Mean | Variance | Std. Dev | Mean. Dev | Skewness | Kurtosis | Minimum | Median |
| --- | --- | --- | --- | --- | --- | --- | --- | --- | --- |
| ANG1 | 19 | 111.839 | 8.367 | 2.893 | 2.215 | -0.476 | 0.294 | 104.708 | 112.657 |
| ANG2 | 19 | 102.430 | 15.365 | 3.920 | 3.187 | 0.099 | -1.120 | 95.836 | 103.375 |
| ANG3 | 19 | 112.473 | 1.758 | 1.326 | 1.084 | 0.508 | -0.914 | 110.605 | 112.234 |
| ANG4 | 19 | 105.440 | 8.681 | 2.946 | 2.499 | -0.410 | -1.145 | 99.852 | 106.276 |
| ANG5 | 19 | 108.825 | 5.158 | 2.271 | 1.676 | 0.491 | -0.529 | 105.313 | 108.507 |
| ANG6 | 19 | 115.092 | 5.935 | 2.436 | 1.612 | -1.712 | 2.726 | 107.463 | 115.617 |
| DIST1 | 19 | 1.481 | 0.000 | 0.013 | 0.008 | 2.381 | 6.516 | 1.466 | 1.479 |
| DIST2 | 19 | 2.079 | 0.000 | 0.017 | 0.013 | -0.061 | -1.190 | 2.052 | 2.081 |
| DIST3 | 19 | 1.826 | 0.001 | 0.028 | 0.025 | 0.153 | -1.515 | 1.785 | 1.832 |
| DIST4 | 19 | 1.799 | 0.000 | 0.010 | 0.008 | 0.074 | -0.285 | 1.778 | 1.801 |
| R-factor | 19 | 3.950 | 0.739 | 0.860 | 0.673 | 0.037 | -0.330 | 2.1 | 4.16 |

**Fig. SI-3.** Searches to Table 1. (Summary page and some statistics only)


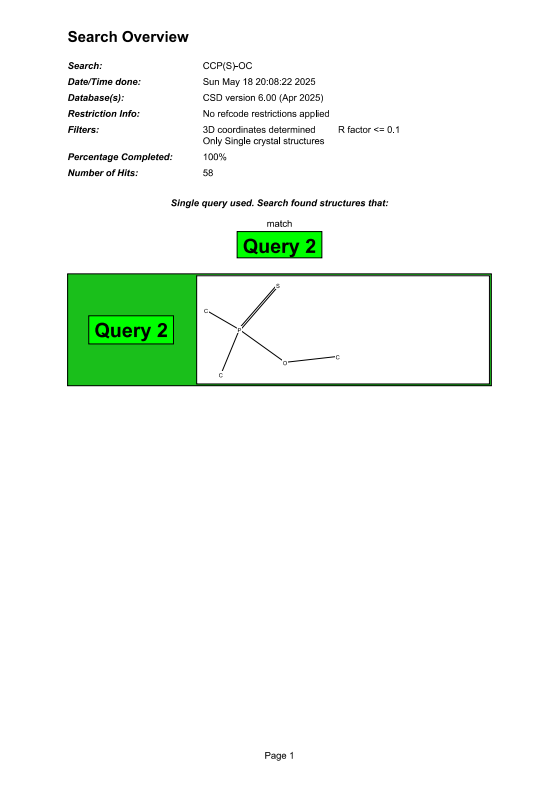


| Name | Count | Mean | Variance | Std. Dev | Mean. Dev | Skewness | Kurtosis | Minimum | Median | Maximum |
| --- | --- | --- | --- | --- | --- | --- | --- | --- | --- | --- |
| ANG1 | 89 | 115.267 | 13.962 | 3.737 | 2.635 | 0.287 | 2.048 | 105.163 | 115.127 | 128.151 |
| ANG2 | 89 | 102.273 | 15.698 | 3.962 | 3.250 | 0.042 | -0.594 | 94.074 | 102.792 | 110.961 |
| ANG3 | 89 | 114.650 | 7.990 | 2.827 | 1.935 | -0.749 | 1.706 | 105.897 | 114.746 | 121.978 |
| ANG4 | 89 | 103.969 | 10.894 | 3.301 | 2.589 | -0.045 | 0.231 | 94.98 | 104.242 | 114.309 |
| ANG5 | 89 | 103.923 | 48.886 | 6.992 | 5.791 | -1.097 | 0.150 | 82.634 | 107.078 | 114.007 |
| ANG6 | 89 | 114.935 | 3.493 | 1.869 | 1.239 | -2.128 | 8.361 | 104.99 | 115.25 | 118.236 |
| DIST1 | 89 | 1.942 | 0.001 | 0.023 | 0.018 | 1.481 | 1.900 | 1.908 | 1.933 | 2.034 |
| DIST2 | 89 | 1.606 | 0.000 | 0.019 | 0.015 | 1.006 | 2.001 | 1.563 | 1.604 | 1.681 |
| DIST3 | 89 | 1.802 | 0.000 | 0.022 | 0.017 | 0.621 | 0.369 | 1.754 | 1.8 | 1.867 |
| DIST4 | 89 | 1.801 | 0.000 | 0.021 | 0.015 | 0.382 | 3.805 | 1.717 | 1.8 | 1.882 |
| R-factor | 89 | 5.381 | 4.814 | 2.194 | 1.833 | 0.505 | -0.883 | 2.1 | 4.92 | 9.54 |

**Fig. SI-4.** Searches to Table 1. (Summary page and some statistics only)


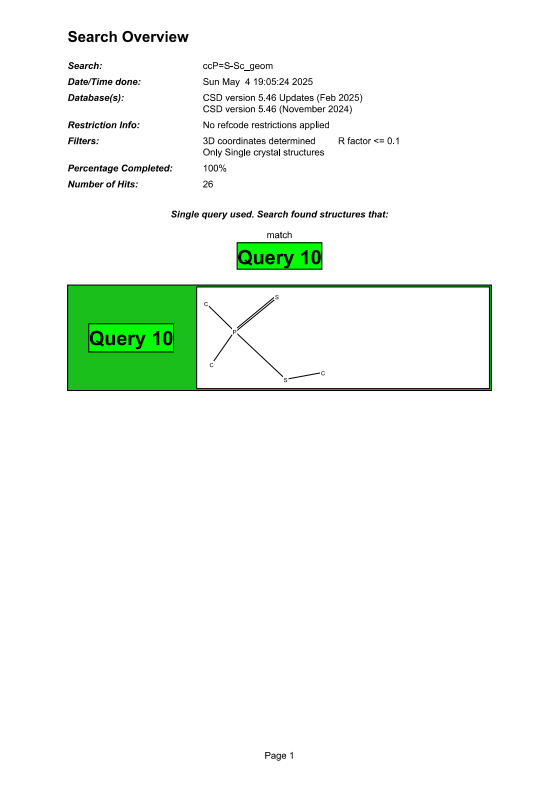


| Name | Count | Mean | Variance | Std. Dev | Mean. Dev | Skewness | Kurtosis | Minimum | Median | Maximum |
| --- | --- | --- | --- | --- | --- | --- | --- | --- | --- | --- |
| ANG1 | 27 | 115.285 | 8.734 | 2.955 | 2.440 | 0.745 | -0.705 | 111.385 | 114.281 | 122.419 |
| ANG2 | 27 | 101.239 | 51.291 | 7.162 | 5.401 | -0.853 | 0.264 | 83.716 | 101.734 | 112.83 |
| ANG3 | 27 | 114.916 | 13.038 | 3.611 | 2.689 | 1.223 | 0.965 | 109.09 | 113.606 | 124.834 |
| ANG4 | 27 | 102.136 | 40.112 | 6.333 | 4.750 | -0.850 | 0.982 | 83.196 | 102.562 | 114.019 |
| ANG5 | 27 | 105.284 | 23.305 | 4.827 | 3.425 | -1.075 | 0.971 | 92.734 | 106.476 | 114.757 |
| ANG6 | 27 | 115.909 | 10.232 | 3.199 | 2.476 | 0.291 | 0.060 | 108.344 | 114.96 | 122.948 |
| DIST1 | 27 | 1.942 | 0.000 | 0.009 | 0.007 | -0.473 | -0.999 | 1.923 | 1.942 | 1.954 |
| DIST2 | 27 | 2.098 | 0.000 | 0.015 | 0.012 | 0.076 | -0.860 | 2.071 | 2.096 | 2.127 |
| DIST3 | 27 | 1.813 | 0.001 | 0.023 | 0.017 | 0.124 | -0.485 | 1.773 | 1.813 | 1.864 |
| DIST4 | 27 | 1.811 | 0.001 | 0.025 | 0.019 | -0.445 | -0.061 | 1.754 | 1.816 | 1.863 |
| R-factor | 27 | 4.326 | 2.472 | 1.572 | 1.142 | 1.154 | 0.522 | 2.2 | 3.9 | 8.2 |

**Fig. SI-5.**  Searches to Table **1 and 2** (Summary page only)


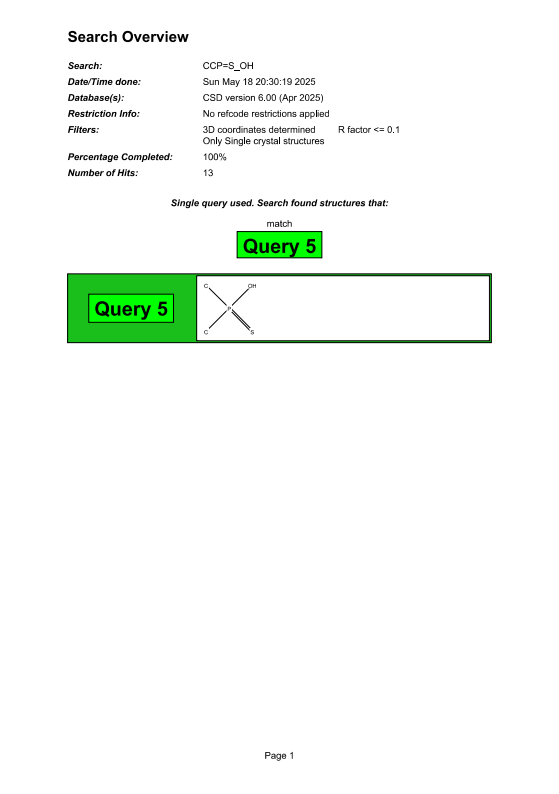


**Fig. SI-6.** A thiophosphinate search Summary page


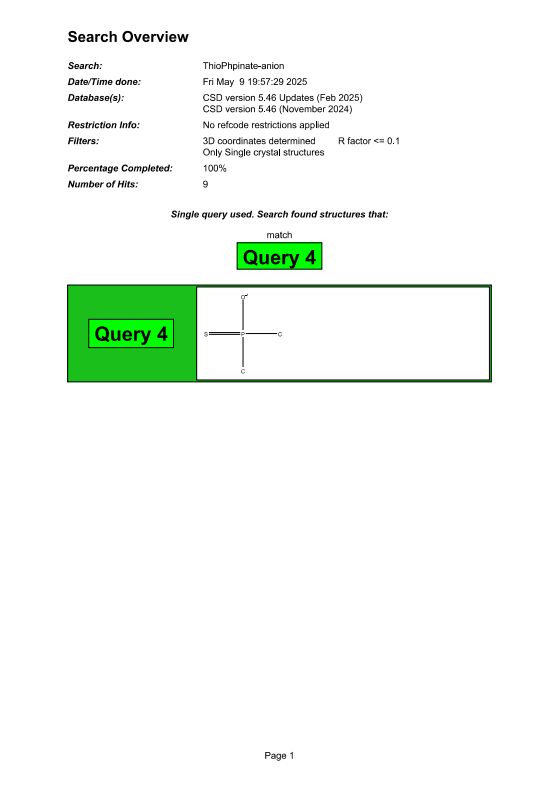


**Fig. SI-7.** Anion search summary page


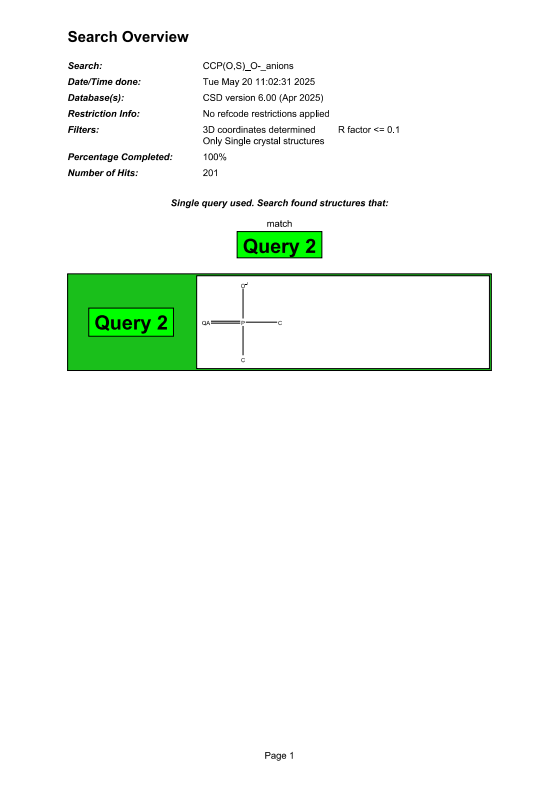


**Fig. SI-8.** Search summary and some statistics for the phosphinoate-anion to any HO -- NM contacts


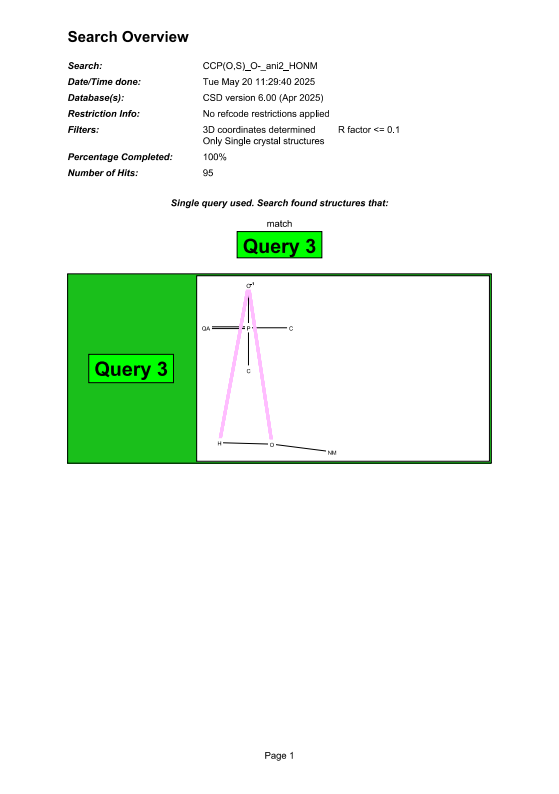


| Name | Count | Mean | Variance | Std. Dev | Min | Median | Max | Low outliers | High outliers | Total outliers |
| --- | --- | --- | --- | --- | --- | --- | --- | --- | --- | --- |
| DIST5 | 158 | 2.726 | 0.016 | 0.126 | 2.402 | 2.742 | 2.974 | 0 | 0 | 0 |
| DIST6 | 158 | 1.889 | 0.031 | 0.177 | 1.246 | 1.910 | 2.269 | 2 | 0 | 2 |

**Fig. SI-9.** Search summary for the phosphinoate-anion to any HO -- NM contacts restricted to ONLY ORGANIC crystal structures (Organometallic ones excluded)


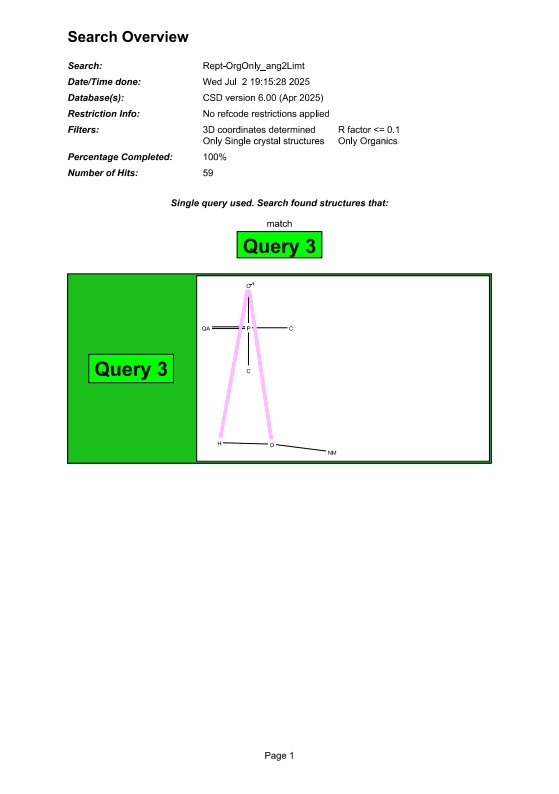


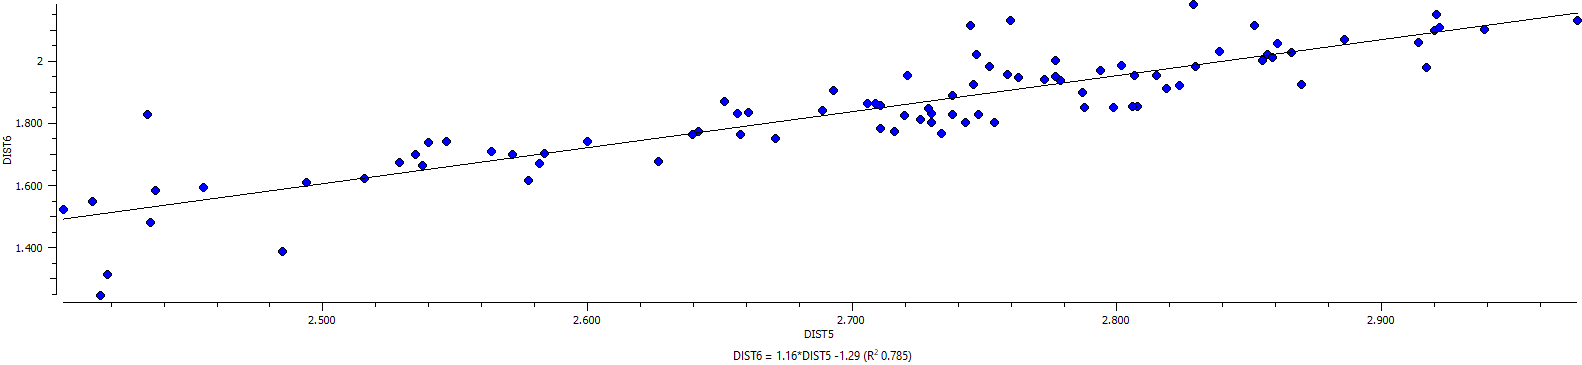


A scatter-plot from the above search. Regression equation is DIST6 = 1.16*DIST5 - 1.29 with *R2* is 0.785 thus *R* is 0.886. Out of the generally applied search conditions (R< 10%, only single crystal XRD) an only additional restriction was to set O...H-O angle in the range 119-180o.

The underlying statistics is below

| Name | Count | Mean | Varianc | Std. Dev | Min | Lowr quart | Median |
| --- | --- | --- | --- | --- | --- | --- | --- |
| DIST5 | 90 | 2.710 | 0.020 | 0.141 | 2.402 | 2.630 | 2.738 |
| DIST6 | 90 | 1.847 | 0.034 | 0.184 | 1.246 | 1.753 | 1.851 |
| R-factor | 90 | 4.481 | 2.140 | 1.463 | 2.32 | 3.280 | 4.08 |

**Fig. SI-10.** Theoretical model of an isolated SORKOB molecule (without the water solvent one) Taken from 0010aaa_SORKOB_b3lyp6311++2p2d.log

**Table SI-1.** Interaction energies in SORKOB (HF-approach, CrystalExplorer V24.11 Build a03138e)


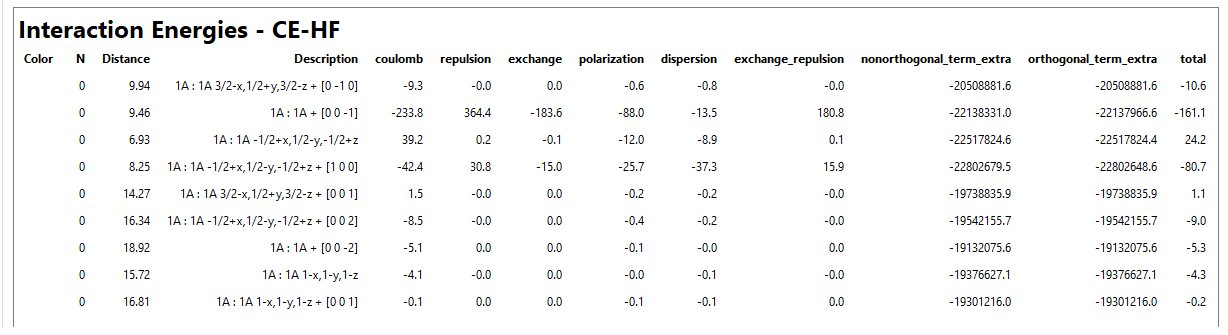


**Fig. SI-11.**  SORKOB molecule with the important H-bridge chain along the *c*-axis (***C11(8)****c*, for the full graph set of this sophisticated crystal structure see Table SI-2.)


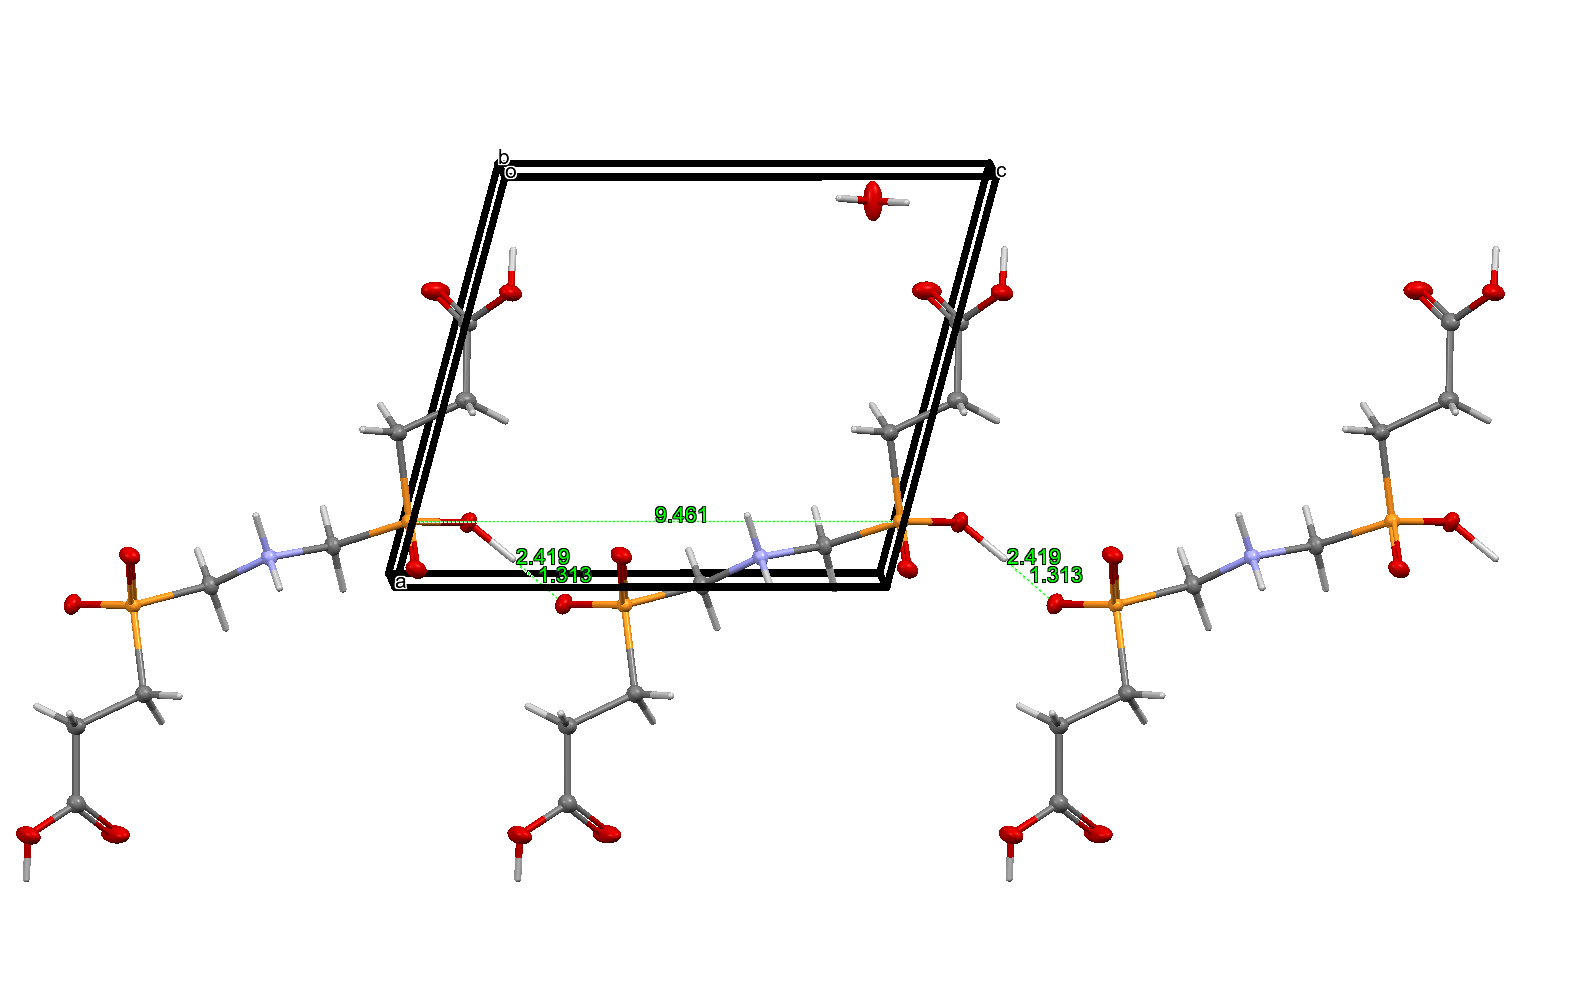


## 2. Theoretical calculations

**Table SI-3**. Computed energies (*E*), zero point energies (*ZPE*), internal energies (*U*), enthalpies (*H*) and Gibbs free energies (*G*) given in Hartree as well as entropies (*S*) given in
J mol–1 K–1 at B3LYP/6-31G(d,p)[PCM(toluene)] basis set with the consideration of PCM solvent method using the parameter set of water for small molecules and ions used for the calculations.

| **Filename** | **E** | **ZPE** | **U** | **H** | **G** | **S** |
| --- | --- | --- | --- | --- | --- | --- |
| 000aaa_5_H2O_+2H2O_b3lyp6311++2d2p_PCMw.log | -535.33950562 | -535.167197 | -535.149079 | -535.148134 | -535.214347 | 139.355 |
| 000aaa_5_H2O_+3H2O_B3LYP6311++2d2p_PCMw.log | -611.81788924 | -611.620938 | -611.599928 | -611.598984 | -611.673455 | 156.739 |
| 001aaa_5_H2O_+3H2O_+H+_b3lyp6311++2d2p_PCMw.log | -612.24865256 | -612.039396 | -612.019079 | -612.018135 | -612.090583 | 152.481 |
| 002aab_5_H2O_+3H2O_-H+_b3lyp6311++2d2p_PCMw.log | -611.34170950 | -611.159337 | -611.139380 | -611.138436 | -611.210834 | 152.376 |
| 000aaa_5_H2O_+2H2O_b3lyp6311++2d2p_PCMdmso.log | -535.33921998 | -535.166880 | -535.148753 | -535.147809 | -535.214103 | 139.527 |
| 000aaa_5_H2O_+3H2O_B3LYP6311++2d2p_PCMdmso.log | -611.81756172 | -611.620571 | -611.599556 | -611.598612 | -611.673173 | 156.927 |
| 001aaa_5_H2O_+3H2O_+H+_b3lyp6311++2d2p_PCMdmso.log | -612.24771425 | -612.038476 | -612.018138 | -612.017194 | -612.090100 | 153.445 |
| 000daa_5_H2O_+3H2O_-H+_b3lyp6311++2d2p_PCMdmso.log | -611.34501564 | -611.159450 | -611.141068 | -611.140123 | -611.204564 | 135.627 |

**Table SI-4**. Computed energies (*E*), zero point energies (*ZPE*), internal energies (*U*), enthalpies (*H*) and Gibbs free energies (*G*) given in Hartree as well as entropies (*S*) given in J mol–1 K–1 at B3LYP/6-31G(d,p)[PCM(toluene)] basis set with the consideration of PCM solvent method using the parameter set of water for small molecules and ions used for the calculations.

| **Molecule** | **Filename** | **E** | **ZPE** | **U** | **H** | **G** | **S** |
| --- | --- | --- | --- | --- | --- | --- | --- |
| Me2POSH | 0001aab_Me2PO_SH_b3lyp6311++2d2p_PMCw.log | -895.38261903 | -895.293457 | -895.285685 | -895.284740 | -895.324991 | 84.714 |
| Me2POSH_TS | 0002aab_Me2PO_SH_b3lyp6311++2d2p_PMCw_TS_OH.log | -895.34099322 | -895.254796 | -895.247652 | -895.246707 | -895.285827 | 82.334 |
| Me2PSOH | 0005aab_Me2PS_OH_b3lyp6311++2d2p_PMCw.log | -895.39102108 | -895.299051 | -895.291369 | -895.290425 | -895.330536 | 84.422 |
| Me2POSH | 0001aaa_Me2PO_SH_b3lyp6311++2d2p_PMCdmso.log | -895.38241821 | -895.293247 | -895.285479 | -895.284535 | -895.324774 | 84.691 |
| Me2POSH_TS | 0002aaa_Me2PO_SH_b3lyp6311++2d2p_PMCdmso_TS_OH.log | -895.34083218 | -895.254671 | -895.247506 | -895.246562 | -895.285752 | 82.481 |
| Me2PSOH | 0005aaa_Me2PS_OH_b3lyp6311++2d2p_PMCdmso.log | -895.39085180 | -895.298874 | -895.291195 | -895.290251 | -895.330349 | 84.392 |
| Me2POSH | 0001aac_Me2PO_SH_b3lyp6311++2d2p_PMCdcm.log | -895.38046868 | -895.291243 | -895.283488 | -895.282544 | -895.322751 | 84.623 |
| Me2POSH_TS | 0002aac_Me2PO_SH_b3lyp6311++2d2p_PMCdcm_TS_OH.log | -895.33927657 | -895.253251 | -895.245986 | -895.245042 | -895.284667 | 83.399 |
| Me2PSOH | 0005aac_Me2PS_OH_b3lyp6311++2d2p_PMCdcm.log | -895.38924764 | -895.297349 | -895.289591 | -895.288647 | -895.329110 | 85.161 |
| Me2POSH | 0001aad_Me2PO_SH_b3lyp6311++2d2p_PMCtol.log | -895.37541394 | -895.286147 | -895.278392 | -895.277448 | -895.317653 | 84.619 |
| Me2POSH_TS | 0002aad_Me2PO_SH_b3lyp6311++2d2p_PMCtol_TS_OH.log | -895.33525634 | -895.249012 | -895.241828 | -895.240884 | -895.280179 | 82.703 |
| Me2PSOH | 0005aad_Me2PS_OH_b3lyp6311++2d2p_PMCtol.log | -895.38524486 | -895.293316 | -895.285580 | -895.284636 | -895.324945 | 84.838 |
| Me2POSH | 0001aae_Me2PO_SH_b3lyp6311++2d2p.log | -895.36944079 | -895.280317 | -895.272450 | -895.271506 | -895.312087 | 85.409 |
| Me2POSH_TS | 0002aae_Me2PO_SH_b3lyp6311++2d2p_TS_OH.log | -895.33041437 | -895.243736 | -895.236710 | -895.235766 | -895.274577 | 81.685 |
| Me2PSOH | 0005aae_Me2PS_OH_b3lyp6311++2d2p.log | -895.38049432 | -895.288158 | -895.280610 | -895.279666 | -895.319397 | 83.621 |

**Table SI-4**. Computed energies (*E*), zero point energies (*ZPE*), internal energies (*U*), enthalpies (*H*) and Gibbs free energies (*G*) given in Hartree as well as entropies (*S*) given in J mol–1 K–1 at B3LYP/6-31G(d,p)[PCM(toluene)] basis set with the consideration of PCM solvent method using the parameter set of water for small molecules and ions used for the calculations.

| **Molecule** | **Filename** | **E** | **ZPE** | **U** | **H** | **G** | **S** |
| --- | --- | --- | --- | --- | --- | --- | --- |
| dimer A | 0003aaa_Me2PO_SH_dimer_b3lyp6311++2d2p_PMCdmso_f.log | -1790.77205005 | -1790.591973 | -1790.575304 | -1790.574360 | -1790.637564 | 133.023 |
| TS3 | 0003aba_Me2PO_SH_dimer_b3lyp6311++2d2p_PMCdmso_TS_HO.log | -1790.76575900 | -1790.589043 | -1790.573220 | -1790.572276 | -1790.633436 | 128.723 |
| dimer B | 0007aaa_Me2PS_OH_dimer_b3lyp6311++2d2p_PMCdmso.log | -1790.79509264 | -1790.609210 | -1790.593112 | -1790.592168 | -1790.654413 | 131.006 |
| dimer C | 0007baa_Me2PS_OH_dimer_+H+_b3lyp6311++2d2p_PMCdmso.log | -1791.20730100 | -1791.012301 | -1790.995713 | -1790.994769 | -1791.056346 | 129.600 |
| dimer D | 0007caa_Me2PO_SH_dimer_-H+_b3lyp6311++2d2p_PMCdmso.log | -1790.32217600 | -1790.151497 | -1790.135258 | -1790.134314 | -1790.197388 | 132.750 |
| Me2POS– | 0010aaa_Me2PO_S-_b3lyp6311++2d2p_PMCdmso.log | -894.93413893 | -894.853459 | -894.846577 | -894.845633 | -894.884045 | 80.844 |
| Me2POHSH+ | 0013aaa_Me2PO_SH_+H+_b3lyp6311++2d2p_PMCdmso.log | -895.80635940 | -895.705208 | -895.697135 | -895.696191 | -895.736831 | 85.534 |
| MePhPOSH | 0101aaa_MePhPO_SH_b3lyp6311++2d2p_PMCdmso.log | -1087.16592700 | -1087.023010 | -1087.012222 | -1087.011278 | -1087.059950 | 102.440 |
| MePhPOS– | 0110aaa_MePhPO_S-_b3lyp6311++2d2p_PMCdmso.log | -1086.71923400 | -1086.584889 | -1086.574942 | -1086.573998 | -1086.621099 | 99.133 |
| MePhPOSH2+ | 0113aaa_MePhPO_SH_+H+_b3lyp6311++2d2p_PMCdmso.log | -1087.58739600 | -1087.432364 | -1087.421333 | -1087.420389 | -1087.469329 | 103.002 |
| Ph2POSH | 0201aaa_Ph2PO_SH_b3lyp6311++2d2p_PMCdmso.log | -1278.94828800 | -1278.751602 | -1278.737774 | -1278.736830 | -1278.794097 | 120.529 |
| Ph2PSOH | 0205aaa_Ph2PO_SH_b3lyp6311++2d2p_PMCdmso.log | -1278.95612800 | -1278.756748 | -1278.742986 | -1278.742042 | -1278.799536 | 121.006 |
| Ph2POS– | 0210aaa_Ph2PO_S-_b3lyp6311++2d2p_PMCdmso.log | -1278.50397900 | -1278.315981 | -1278.302910 | -1278.301966 | -1278.357617 | 117.127 |

**Table SI-4**. Computed energies (*E*), zero point energies (*ZPE*), internal energies (*U*), enthalpies (*H*) and Gibbs free energies (*G*) given in Hartree as well as entropies (*S*) given in J mol–1 K–1 at B3LYP/6-31G(d,p)[PCM(toluene)] basis set with the consideration of PCM solvent method using the parameter set of water for small molecules and ions used for the calculations.

| **Molecule** | **Filename** | **E** | **ZPE** | **U** | **H** | **G** | **S** |
| --- | --- | --- | --- | --- | --- | --- | --- |
| complex 1 | 0301aaa_Me2PO_SH_MeOH_b3lyp6311++2d2p_PMCdmso.log | -1011.16500106 | -1011.022787 | -1011.010466 | -1011.009522 | -1011.062733 | 111.991 |
| TS2 | 0302aaa_Me2PO_SH_MeOH_b3lyp6311++2d2p_PCMdmso_TS_HS.log | -1011.15612896 | -1011.015693 | -1011.004878 | -1011.003934 | -1011.052536 | 102.293 |
| complex 2 | 0303aaa_Me2PS_OH_MeOH_b3lyp6311++2d2p_PMCdmso.log | -1011.17751935 | -1011.031969 | -1011.020198 | -1011.019253 | -1011.071323 | 109.590 |
| dimer C | 0004aaa_Me2PO_SH_Me2PSOH_dimer_b3lyp6311++2d2p_PMCdmso.log | -1790.78783640 | -1790.604903 | -1790.588567 | -1790.587623 | -1790.650310 | 131.936 |
| dimer D | 0004kaa_Me2PO_SH_Me2PSOH_assymdimer_b3lyp6311++2d2p_PMCdmso.log | -1790.78514887 | -1790.602793 | -1790.586687 | -1790.585743 | -1790.649705 | 134.619 |
| TS4 | 0004nba_Me2PO_SH_Me2PSOH_assymdimer_b3lyp6311++2d2p_PCMdmso_TS_SH_O.log | -1790.76859054 | -1790.588454 | -1790.573127 | -1790.572182 | -1790.632900 | 127.790 |
| dimer E | 0004oaa_Me2PO_SH_Me2PSOH_assymdimer_b3lyp6311++2d2p_PCMdmso_SCAN_SH_O_vege.log | -1790.78945488 | -1790.603728 | -1790.587208 | -1790.586264 | -1790.651689 | 137.697 |

**Tables containing XYZ coordinates of computed species at B3LYP/6-31G(d,p)[PCM(toluene)]**

0001aaa_Me2PO_SH_b3lyp6311++2d2p_PMCdmso.log

Standard orientation:

---------------------------------------------------------------------

Center Atomic Atomic Coordinates (Angstroms)

Number Number Type X Y Z

---------------------------------------------------------------------

1 15 0 -0.386361 0.014456 0.179605

2 6 0 -1.010760 1.344132 -0.882653

3 1 0 -2.098750 1.346584 -0.818010

4 1 0 -0.630222 2.297326 -0.521590

5 1 0 -0.702049 1.193425 -1.914247

6 6 0 -0.882640 -1.558731 -0.567768

7 1 0 -0.533574 -1.631699 -1.595766

8 1 0 -0.476086 -2.378570 0.020401

9 1 0 -1.970565 -1.610591 -0.549339

10 8 0 -0.782248 0.175918 1.612969

11 16 0 1.742044 -0.042760 -0.125618

12 1 0 1.952335 1.131100 0.493130

---------------------------------------------------------------------

0001aab_Me2PO_SH_b3lyp6311++2d2p_PMCw.log

Standard orientation:

---------------------------------------------------------------------

Center Atomic Atomic Coordinates (Angstroms)

Number Number Type X Y Z

---------------------------------------------------------------------

1 15 0 0.386426 -0.014346 0.179425

2 6 0 1.010373 -1.345082 -0.881626

3 1 0 2.098365 -1.347550 -0.817290

4 1 0 0.629678 -2.297872 -0.519665

5 1 0 0.701463 -1.195168 -1.913266

6 6 0 0.883021 1.558273 -0.568758

7 1 0 0.533926 1.630639 -1.596769

8 1 0 0.476569 2.378552 0.018871

9 1 0 1.970947 1.609842 -0.550470

10 8 0 0.782194 -0.174812 1.613074

11 16 0 -1.742082 0.043096 -0.125226

12 1 0 -1.951936 -1.133446 0.488546

---------------------------------------------------------------------

0001aac_Me2PO_SH_b3lyp6311++2d2p_PMCdcm.log

Standard orientation:

---------------------------------------------------------------------

Center Atomic Atomic Coordinates (Angstroms)

Number Number Type X Y Z

---------------------------------------------------------------------

1 15 0 0.386428 -0.015453 0.181914

2 6 0 1.014009 -1.334807 -0.893241

3 1 0 2.101929 -1.338091 -0.827391

4 1 0 0.633938 -2.291350 -0.540560

5 1 0 0.705485 -1.176295 -1.923813

6 6 0 0.880527 1.563390 -0.557257

7 1 0 0.523871 1.645989 -1.582117

8 1 0 0.479062 2.378307 0.041056

9 1 0 1.968576 1.614717 -0.546085

10 8 0 0.780996 -0.188623 1.612041

11 16 0 -1.741883 0.040405 -0.129570

12 1 0 -1.954343 -1.110466 0.529980

---------------------------------------------------------------------

0001aad_Me2PO_SH_b3lyp6311++2d2p_PMCtol.log

Standard orientation:

---------------------------------------------------------------------

Center Atomic Atomic Coordinates (Angstroms)

Number Number Type X Y Z

---------------------------------------------------------------------

1 15 0 0.385686 -0.018208 0.187213

2 6 0 1.022937 -1.313431 -0.915636

3 1 0 2.110747 -1.316504 -0.846560

4 1 0 0.645512 -2.277322 -0.580689

5 1 0 0.715090 -1.139492 -1.944225

6 6 0 0.879162 1.572943 -0.531947

7 1 0 0.505934 1.680431 -1.549064

8 1 0 0.491498 2.376118 0.090655

9 1 0 1.967559 1.620229 -0.537094

10 8 0 0.774251 -0.217682 1.610360

11 16 0 -1.741690 0.034872 -0.141647

12 1 0 -1.961201 -1.043900 0.627766

---------------------------------------------------------------------

0001aae_Me2PO_SH_b3lyp6311++2d2p.log

Standard orientation:

---------------------------------------------------------------------

Center Atomic Atomic Coordinates (Angstroms)

Number Number Type X Y Z

---------------------------------------------------------------------

1 15 0 0.382757 -0.021413 0.193484

2 6 0 1.037967 -1.300064 -0.922679

3 1 0 2.125727 -1.295161 -0.851162

4 1 0 0.668131 -2.269646 -0.596092

5 1 0 0.730404 -1.123178 -1.951370

6 6 0 0.898328 1.573840 -0.508745

7 1 0 0.529748 1.699478 -1.525999

8 1 0 0.512865 2.371214 0.122437

9 1 0 1.987239 1.613505 -0.508769

10 8 0 0.741902 -0.238424 1.616203

11 16 0 -1.741839 0.028147 -0.171192

12 1 0 -1.979028 -0.860620 0.806685

---------------------------------------------------------------------

0002aaa_Me2PO_SH_b3lyp6311++2d2p_PMCdmso_SCAN_OH.log

Standard orientation:

---------------------------------------------------------------------

Center Atomic Atomic Coordinates (Angstroms)

Number Number Type X Y Z

---------------------------------------------------------------------

1 15 0 0.208485 0.000003 0.031559

2 6 0 1.051848 -1.449758 -0.648299

3 1 0 2.113403 -1.398147 -0.409921

4 1 0 0.620043 -2.346173 -0.209388

5 1 0 0.919782 -1.474582 -1.727910

6 6 0 1.051790 1.449848 -0.648212

7 1 0 0.919747 1.474705 -1.727819

8 1 0 0.619985 2.346224 -0.209226

9 1 0 2.113345 1.398249 -0.409811

10 8 0 0.668043 -0.000101 1.597330

11 16 0 -1.759443 -0.000015 -0.187135

12 1 0 -0.248662 0.000191 2.215279

---------------------------------------------------------------------

0002aaa_Me2PO_SH_b3lyp6311++2d2p_PMCdmso_TS_OH.log

Standard orientation:

---------------------------------------------------------------------

Center Atomic Atomic Coordinates (Angstroms)

Number Number Type X Y Z

---------------------------------------------------------------------

1 15 0 -0.314516 0.000008 0.095881

2 6 0 -1.233686 1.455402 -0.448288

3 1 0 -2.228058 1.433840 -0.002482

4 1 0 -0.705036 2.347698 -0.122216

5 1 0 -1.324345 1.457272 -1.532803

6 6 0 -1.233459 -1.455119 -0.449374

7 1 0 -1.324895 -1.455810 -1.533835

8 1 0 -0.704330 -2.347632 -0.124685

9 1 0 -2.227520 -1.434334 -0.002837

10 8 0 -0.021289 -0.000788 1.627229

11 16 0 1.683797 0.000317 -0.430766

12 1 0 1.264361 -0.001618 1.141045

---------------------------------------------------------------------

0002aab_Me2PO_SH_b3lyp6311++2d2p_PMCw_TS_OH.log

Standard orientation:

---------------------------------------------------------------------

Center Atomic Atomic Coordinates (Angstroms)

Number Number Type X Y Z

---------------------------------------------------------------------

1 15 0 -0.314845 -0.000090 0.095910

2 6 0 -1.233042 1.455443 -0.449102

3 1 0 -2.227597 1.434182 -0.003723

4 1 0 -0.704364 2.347869 -0.123436

5 1 0 -1.323336 1.456437 -1.533656

6 6 0 -1.234476 -1.455224 -0.447693

7 1 0 -1.324962 -1.456777 -1.532201

8 1 0 -0.706343 -2.347814 -0.121565

9 1 0 -2.228925 -1.433015 -0.002104

10 8 0 -0.019987 0.001193 1.627052

11 16 0 1.683622 -0.000703 -0.431148

12 1 0 1.265259 0.000856 1.140755

---------------------------------------------------------------------

0002aac_Me2PO_SH_b3lyp6311++2d2p_PMCdcm_TS_OH.log

Standard orientation:

---------------------------------------------------------------------

Center Atomic Atomic Coordinates (Angstroms)

Number Number Type X Y Z

---------------------------------------------------------------------

1 15 0 -0.313026 -0.000014 0.097376

2 6 0 -1.232842 1.455475 -0.449679

3 1 0 -2.228582 1.436524 -0.006800

4 1 0 -0.704151 2.346964 -0.121383

5 1 0 -1.319676 1.459612 -1.534592

6 6 0 -1.233028 -1.454748 -0.451348

7 1 0 -1.322881 -1.455798 -1.536058

8 1 0 -0.703000 -2.346920 -0.127113

9 1 0 -2.227535 -1.437519 -0.005623

10 8 0 -0.024419 -0.001248 1.627799

11 16 0 1.683069 0.000309 -0.430473

12 1 0 1.262678 -0.001971 1.142267

---------------------------------------------------------------------

0002aad_Me2PO_SH_b3lyp6311++2d2p_PMCtol_TS_OH.log

Standard orientation:

---------------------------------------------------------------------

Center Atomic Atomic Coordinates (Angstroms)

Number Number Type X Y Z

---------------------------------------------------------------------

1 15 0 -0.306831 -0.000004 0.099740

2 6 0 -1.232489 1.452948 -0.454272

3 1 0 -2.226896 1.437124 -0.008057

4 1 0 -0.702884 2.345127 -0.129299

5 1 0 -1.321351 1.456657 -1.539250

6 6 0 -1.232522 -1.453020 -0.454025

7 1 0 -1.324982 -1.454862 -1.538698

8 1 0 -0.700842 -2.345172 -0.132375

9 1 0 -2.225436 -1.439152 -0.004444

10 8 0 -0.033849 0.000179 1.628041

11 16 0 1.681663 -0.000076 -0.429064

12 1 0 1.259107 0.000554 1.146494

---------------------------------------------------------------------

0002aae_Me2PO_SH_b3lyp6311++2d2p_TS_OH.log

Standard orientation:

---------------------------------------------------------------------

Center Atomic Atomic Coordinates (Angstroms)

Number Number Type X Y Z

---------------------------------------------------------------------

1 15 0 -0.299563 -0.000062 0.102838

2 6 0 -1.232522 1.450155 -0.457456

3 1 0 -2.228246 1.432207 -0.013977

4 1 0 -0.706397 2.343166 -0.128854

5 1 0 -1.317357 1.457443 -1.542900

6 6 0 -1.233511 -1.449198 -0.458513

7 1 0 -1.319268 -1.455100 -1.543899

8 1 0 -0.707753 -2.342964 -0.131412

9 1 0 -2.228876 -1.431075 -0.014223

10 8 0 -0.043408 -0.000804 1.628343

11 16 0 1.680566 -0.000088 -0.428057

12 1 0 1.255737 -0.000641 1.150668

---------------------------------------------------------------------

0003aaa_Me2PO_SH_dimer_b3lyp6311++2d2p_PMCdmso_f.log

Standard orientation:

---------------------------------------------------------------------

Center Atomic Atomic Coordinates (Angstroms)

Number Number Type X Y Z

---------------------------------------------------------------------

1 15 0 -2.303138 -0.285376 -0.086134

2 6 0 -2.400863 -1.026924 1.565471

3 1 0 -2.749596 -2.053946 1.459606

4 1 0 -1.409361 -1.029753 2.012997

5 1 0 -3.085339 -0.467505 2.198675

6 6 0 -3.994102 -0.148831 -0.718131

7 1 0 -4.614044 0.438759 -0.043855

8 1 0 -3.972092 0.318419 -1.700197

9 1 0 -4.405276 -1.153588 -0.807285

10 8 0 -1.376763 -1.041306 -0.998767

11 16 0 -1.754516 1.757497 0.187478

12 1 0 -0.469606 1.456089 0.531389

13 15 0 2.303136 0.285375 0.086105

14 6 0 3.994217 0.148972 0.717800

15 1 0 4.405419 1.153750 0.806618

16 1 0 3.972361 -0.317999 1.700004

17 1 0 4.614045 -0.438809 0.043588

18 6 0 2.400490 1.026873 -1.565555

19 1 0 3.084763 0.467392 -2.198925

20 1 0 1.408869 1.029748 -2.012814

21 1 0 2.749323 2.053870 -1.459797

22 8 0 1.376911 1.041317 0.998889

23 16 0 1.754595 -1.757546 -0.187284

24 1 0 0.469656 -1.456248 -0.531176

---------------------------------------------------------------------

0003aaa_Me2PO_SH_dimer_b3lyp6311++2d2p_PMCdmso_SCAN_HO.log

Standard orientation:

---------------------------------------------------------------------

Center Atomic Atomic Coordinates (Angstroms)

Number Number Type X Y Z

---------------------------------------------------------------------

1 15 0 -2.335343 0.085288 0.006457

2 6 0 -2.543429 0.962273 -1.565351

3 1 0 -2.975972 1.944261 -1.380116

4 1 0 -1.571296 1.073834 -2.040728

5 1 0 -3.196067 0.386071 -2.217585

6 6 0 -3.943706 0.051398 0.825170

7 1 0 -4.639265 -0.530216 0.224652

8 1 0 -3.832521 -0.414714 1.801388

9 1 0 -4.316549 1.067667 0.941407

10 8 0 -1.516247 1.077983 0.974225

11 16 0 -1.525088 -1.726134 -0.217056

12 1 0 0.645002 -1.228487 -0.763681

13 15 0 2.340585 -0.086247 0.006441

14 6 0 3.979140 -0.067613 -0.747705

15 1 0 4.364636 -1.083876 -0.810088

16 1 0 3.903171 0.360446 -1.744500

17 1 0 4.644840 0.542854 -0.142108

18 6 0 2.483688 -0.903056 1.616613

19 1 0 3.104757 -0.298757 2.274279

20 1 0 1.492111 -1.002385 2.052893

21 1 0 2.927895 -1.888729 1.487413

22 8 0 1.567899 -1.120472 -0.958570

23 16 0 1.504631 1.723825 0.123710

24 1 0 -0.569428 1.205263 0.719230

---------------------------------------------------------------------

0003aba_Me2PO_SH_dimer_b3lyp6311++2d2p_PMCdmso_TS_HO.log

Standard orientation:

---------------------------------------------------------------------

Center Atomic Atomic Coordinates (Angstroms)

Number Number Type X Y Z

---------------------------------------------------------------------

1 15 0 -2.182887 0.223367 0.069236

2 6 0 -2.461137 0.966463 -1.566340

3 1 0 -2.886886 1.960752 -1.433269

4 1 0 -1.507346 1.051431 -2.083142

5 1 0 -3.137054 0.351652 -2.156437

6 6 0 -3.822164 0.025131 0.821380

7 1 0 -4.456375 -0.604427 0.200605

8 1 0 -3.708673 -0.428862 1.803459

9 1 0 -4.277428 1.009045 0.929653

10 8 0 -1.288380 1.108344 0.918852

11 16 0 -1.461339 -1.714795 -0.213310

12 1 0 0.013291 -1.275232 -0.614916

13 15 0 2.158782 -0.233094 -0.046276

14 6 0 3.820854 -0.235511 -0.739628

15 1 0 4.157384 -1.267745 -0.820773

16 1 0 3.795105 0.217825 -1.727783

17 1 0 4.498265 0.320913 -0.095220

18 6 0 2.201876 -0.998236 1.589985

19 1 0 2.908260 -0.472984 2.228292

20 1 0 1.208216 -0.952440 2.030295

21 1 0 2.501577 -2.039708 1.478765

22 8 0 1.201614 -0.991957 -0.979798

23 16 0 1.659426 1.795597 0.167249

24 1 0 0.341410 1.504679 0.508227

---------------------------------------------------------------------

0004aaa_Me2PO_SH_Me2PSOH_dimer_b3lyp6311++2d2p_PMCdmso.log

Standard orientation:

---------------------------------------------------------------------

Center Atomic Atomic Coordinates (Angstroms)

Number Number Type X Y Z

---------------------------------------------------------------------

1 15 0 2.296398 -0.185694 0.077443

2 6 0 2.455689 0.126596 1.857548

3 1 0 3.155942 0.942434 2.023744

4 1 0 1.482598 0.405360 2.256395

5 1 0 2.810809 -0.774051 2.356273

6 6 0 3.909169 -0.761381 -0.501874

7 1 0 4.207361 -1.643936 0.062087

8 1 0 3.835611 -1.008444 -1.558507

9 1 0 4.644649 0.028213 -0.366558

10 15 0 -2.218474 -0.400419 -0.060724

11 6 0 -3.851818 -0.820478 0.585435

12 1 0 -4.132526 -1.795154 0.188100

13 1 0 -3.804504 -0.874455 1.670739

14 1 0 -4.587939 -0.078604 0.283214

15 6 0 -2.341606 -0.263608 -1.860871

16 1 0 -3.137811 0.423817 -2.136277

17 1 0 -1.393225 0.097094 -2.253500

18 1 0 -2.547658 -1.253587 -2.266595

19 8 0 -1.155148 -1.382585 0.366748

20 16 0 -1.899790 1.565459 0.692497

21 1 0 -0.645157 1.628127 0.168090

22 8 0 1.411485 -1.510106 -0.074150

23 1 0 0.426621 -1.394617 0.080378

24 16 0 1.614607 1.406057 -0.916283

---------------------------------------------------------------------

0004kaa_Me2PO_SH_Me2PSOH_assymdimer_b3lyp6311++2d2p_PMCdmso.log

Standard orientation:

---------------------------------------------------------------------

Center Atomic Atomic Coordinates (Angstroms)

Number Number Type X Y Z

---------------------------------------------------------------------

1 15 0 -2.596979 0.195033 0.088402

2 6 0 -2.734163 -0.151693 1.865217

3 1 0 -3.729097 -0.530771 2.088573

4 1 0 -1.997229 -0.905103 2.135809

5 1 0 -2.549813 0.759998 2.431695

6 6 0 -3.732046 1.560056 -0.261563

7 1 0 -3.486777 2.413921 0.368228

8 1 0 -3.635068 1.836783 -1.309002

9 1 0 -4.753245 1.240469 -0.067331

10 15 0 2.415311 -0.293158 0.205527

11 6 0 3.485285 -1.694943 -0.182845

12 1 0 3.207823 -2.518780 0.473344

13 1 0 3.325833 -1.992194 -1.216964

14 1 0 4.531066 -1.440251 -0.025909

15 6 0 2.774044 0.249193 1.893893

16 1 0 3.835545 0.450843 2.014299

17 1 0 2.202301 1.149382 2.109235

18 1 0 2.465934 -0.542299 2.576655

19 8 0 0.955644 -0.599118 -0.003475

20 16 0 3.174342 1.217035 -1.104169

21 1 0 2.335353 2.164419 -0.651691

22 8 0 -1.179291 0.916061 -0.116234

23 1 0 -0.379891 0.317206 -0.076192

24 16 0 -2.900421 -1.419720 -1.032721

---------------------------------------------------------------------

0004nba_Me2PO_SH_Me2PSOH_assymdimer_b3lyp6311++2d2p_PCMdmso_TS_SH_O.log

Standard orientation:

---------------------------------------------------------------------

Center Atomic Atomic Coordinates (Angstroms)

Number Number Type X Y Z

---------------------------------------------------------------------

1 15 0 -2.193306 -0.144478 0.157620

2 6 0 -3.074471 -1.393066 -0.827578

3 1 0 -4.089222 -1.058401 -1.031753

4 1 0 -2.548887 -1.532859 -1.770144

5 1 0 -3.099785 -2.336064 -0.282689

6 6 0 -3.095432 -0.037380 1.732618

7 1 0 -3.121569 -1.018673 2.204997

8 1 0 -2.580842 0.665563 2.384657

9 1 0 -4.109881 0.314509 1.557406

10 15 0 2.326074 0.128874 0.172102

11 6 0 3.850416 -0.515376 0.869021

12 1 0 4.237353 0.202214 1.591286

13 1 0 3.642607 -1.463096 1.359349

14 1 0 4.579706 -0.662810 0.074957

15 6 0 2.663539 1.728679 -0.578533

16 1 0 3.379092 1.609505 -1.389967

17 1 0 1.732925 2.136131 -0.966877

18 1 0 3.073090 2.394675 0.180006

19 8 0 1.307955 0.336000 1.361519

20 16 0 1.513183 -1.195086 -1.197739

21 1 0 0.213797 -1.058485 -0.501948

22 8 0 -0.801375 -0.781209 0.515245

23 1 0 0.372136 -0.021562 1.144705

24 16 0 -2.124995 1.628082 -0.782704

---------------------------------------------------------------------

0004oaa_Me2PO_SH_Me2PSOH_assymdimer_b3lyp6311++2d2p_PCMdmso_SCAN_SH_O_vege.log

Standard orientation:

---------------------------------------------------------------------

Center Atomic Atomic Coordinates (Angstroms)

Number Number Type X Y Z

---------------------------------------------------------------------

1 15 0 -2.383048 -0.151962 0.131797

2 6 0 -3.396166 -1.303309 -0.832956

3 1 0 -4.422634 -0.943780 -0.860231

4 1 0 -3.007706 -1.350047 -1.848122

5 1 0 -3.361186 -2.292438 -0.379350

6 6 0 -2.942533 -0.255089 1.847068

7 1 0 -2.895724 -1.287367 2.189849

8 1 0 -2.302222 0.369840 2.465419

9 1 0 -3.966128 0.107326 1.908355

10 15 0 2.459531 0.046097 0.138118

11 6 0 4.079995 -0.603039 0.595215

12 1 0 4.391527 -0.166508 1.543125

13 1 0 4.013112 -1.684114 0.690516

14 1 0 4.800499 -0.350194 -0.179369

15 6 0 2.602378 1.848974 0.084095

16 1 0 3.277263 2.135103 -0.719990

17 1 0 1.618837 2.274721 -0.102641

18 1 0 2.986462 2.211771 1.036391

19 8 0 1.587285 -0.280418 1.461851

20 16 0 1.696438 -0.734924 -1.532151

21 1 0 -0.362549 -0.821545 -0.538528

22 8 0 -0.932718 -0.890043 0.262470

23 1 0 0.641680 -0.415457 1.266385

24 16 0 -2.312504 1.674870 -0.622576

---------------------------------------------------------------------

0005aaa_Me2PS_OH_b3lyp6311++2d2p_PMCdmso.log

Standard orientation:

---------------------------------------------------------------------

Center Atomic Atomic Coordinates (Angstroms)

Number Number Type X Y Z

---------------------------------------------------------------------

1 15 0 -0.201882 -0.000905 0.027862

2 6 0 -1.076615 1.393435 -0.717569

3 1 0 -2.140205 1.319748 -0.495330

4 1 0 -0.677591 2.318964 -0.309449

5 1 0 -0.925509 1.377150 -1.794618

6 6 0 -0.972572 -1.507977 -0.616949

7 1 0 -0.781397 -1.585079 -1.685213

8 1 0 -0.540632 -2.369395 -0.112258

9 1 0 -2.045749 -1.475458 -0.435351

10 8 0 -0.721739 0.107578 1.569040

11 16 0 1.768395 0.032834 -0.144984

12 1 0 -0.085987 -0.271064 2.188819

---------------------------------------------------------------------

0005aab_Me2PS_OH_b3lyp6311++2d2p_PMCw.log

Standard orientation:

---------------------------------------------------------------------

Center Atomic Atomic Coordinates (Angstroms)

Number Number Type X Y Z

---------------------------------------------------------------------

1 15 0 0.201882 0.000905 0.027862

2 6 0 1.076614 -1.393435 -0.717569

3 1 0 2.140204 -1.319749 -0.495330

4 1 0 0.677590 -2.318964 -0.309449

5 1 0 0.925508 -1.377150 -1.794618

6 6 0 0.972572 1.507977 -0.616949

7 1 0 0.781398 1.585079 -1.685213

8 1 0 0.540633 2.369395 -0.112258

9 1 0 2.045749 1.475457 -0.435351

10 8 0 0.721739 -0.107578 1.569040

11 16 0 -1.768395 -0.032833 -0.144984

12 1 0 0.085987 0.271064 2.188819

---------------------------------------------------------------------

0005aac_Me2PS_OH_b3lyp6311++2d2p_PMCdcm.log

Standard orientation:

---------------------------------------------------------------------

Center Atomic Atomic Coordinates (Angstroms)

Number Number Type X Y Z

---------------------------------------------------------------------

1 15 0 0.200069 0.000315 0.028206

2 6 0 1.072713 -1.406472 -0.700412

3 1 0 2.134949 -1.339060 -0.468836

4 1 0 0.663664 -2.325492 -0.287452

5 1 0 0.931066 -1.399749 -1.778998

6 6 0 1.001204 1.490603 -0.618761

7 1 0 0.836919 1.554704 -1.692378

8 1 0 0.565487 2.362691 -0.136468

9 1 0 2.069469 1.450927 -0.410483

10 8 0 0.701206 -0.076760 1.579031

11 16 0 -1.765011 -0.021083 -0.159623

12 1 0 -0.015555 0.137880 2.188279

---------------------------------------------------------------------

0005aad_Me2PS_OH_b3lyp6311++2d2p_PMCtol.log

Standard orientation:

---------------------------------------------------------------------

Center Atomic Atomic Coordinates (Angstroms)

Number Number Type X Y Z

---------------------------------------------------------------------

1 15 0 0.193273 -0.000008 0.027698

2 6 0 1.045864 -1.446985 -0.654816

3 1 0 2.109184 -1.392200 -0.424218

4 1 0 0.620476 -2.344010 -0.210853

5 1 0 0.902382 -1.478765 -1.732902

6 6 0 1.046245 1.446377 -0.655555

7 1 0 0.903507 1.477048 -1.733776

8 1 0 0.620361 2.343744 -0.212760

9 1 0 2.109396 1.391977 -0.424134

10 8 0 0.692228 0.000641 1.584070

11 16 0 -1.761788 0.000091 -0.166686

12 1 0 -0.066275 -0.000611 2.179809

---------------------------------------------------------------------

0005aae_Me2PS_OH_b3lyp6311++2d2p.log

Standard orientation:

---------------------------------------------------------------------

Center Atomic Atomic Coordinates (Angstroms)

Number Number Type X Y Z

---------------------------------------------------------------------

1 15 0 0.185859 0.000003 0.027361

2 6 0 1.049165 -1.445536 -0.653749

3 1 0 2.109550 -1.400437 -0.407672

4 1 0 0.611640 -2.343123 -0.222800

5 1 0 0.919097 -1.470719 -1.733863

6 6 0 1.049354 1.445370 -0.653884

7 1 0 0.918577 1.471169 -1.733878

8 1 0 0.612771 2.343006 -0.222091

9 1 0 2.109881 1.399467 -0.408500

10 8 0 0.693585 0.000114 1.583328

11 16 0 -1.758696 0.000068 -0.167145

12 1 0 -0.070058 -0.000401 2.171889

---------------------------------------------------------------------

0007aaa_Me2PS_OH_dimer_b3lyp6311++2d2p_PMCdmso.log

Standard orientation:

---------------------------------------------------------------------

Center Atomic Atomic Coordinates (Angstroms)

Number Number Type X Y Z

---------------------------------------------------------------------

1 15 0 -2.322244 -0.089092 -0.001867

2 6 0 -2.497805 -0.939130 1.588203

3 1 0 -2.935702 -1.923228 1.428705

4 1 0 -1.515822 -1.044871 2.044242

5 1 0 -3.135162 -0.350742 2.244655

6 6 0 -3.946657 -0.057397 -0.786939

7 1 0 -4.626176 0.536535 -0.180126

8 1 0 -3.853331 0.394596 -1.771620

9 1 0 -4.327356 -1.073014 -0.880994

10 8 0 -1.523614 -1.094846 -0.970985

11 16 0 -1.504481 1.726627 0.176676

12 1 0 0.573849 1.222811 0.732603

13 15 0 2.322508 0.089227 0.000776

14 6 0 3.949395 0.060385 0.780814

15 1 0 4.331046 1.076201 0.868664

16 1 0 3.858846 -0.386667 1.768013

17 1 0 4.626609 -0.536986 0.174810

18 6 0 2.492960 0.932650 -1.593384

19 1 0 3.128503 0.341757 -2.249349

20 1 0 1.509525 1.036135 -2.046812

21 1 0 2.930940 1.917580 -1.439368

22 8 0 1.527159 1.099182 0.968257

23 16 0 1.503614 -1.726923 -0.167674

24 1 0 -0.571569 -1.221141 -0.731430

---------------------------------------------------------------------

0007baa_Me2PS_OH_dimer_+H+_b3lyp6311++2d2p_PMCdmso.log

Standard orientation:

---------------------------------------------------------------------

Center Atomic Atomic Coordinates (Angstroms)

Number Number Type X Y Z

---------------------------------------------------------------------

1 15 0 -2.408886 0.083799 -0.016784

2 6 0 -2.420547 0.914905 -1.622643

3 1 0 -2.948467 1.863038 -1.536467

4 1 0 -1.395538 1.093198 -1.940197

5 1 0 -2.915429 0.278215 -2.352774

6 6 0 -4.111277 -0.075082 0.549228

7 1 0 -4.659875 -0.706595 -0.145609

8 1 0 -4.115468 -0.531787 1.535971

9 1 0 -4.571571 0.910458 0.594462

10 8 0 -1.833640 1.161516 1.046680

11 16 0 -1.423115 -1.657086 -0.038101

12 1 0 0.448797 -1.089005 -0.733815

13 15 0 2.363555 -0.210732 -0.038452

14 6 0 3.965172 -0.224971 -0.832466

15 1 0 4.272454 -1.259677 -0.977452

16 1 0 3.888622 0.281979 -1.791278

17 1 0 4.682919 0.290987 -0.198259

18 6 0 2.396704 -1.067770 1.537521

19 1 0 3.095617 -0.573978 2.209324

20 1 0 1.399706 -1.070259 1.971067

21 1 0 2.725636 -2.090135 1.353444

22 8 0 1.383177 -0.890210 -1.061465

23 16 0 1.670219 1.768680 0.213802

24 1 0 -0.876422 1.299625 0.982105

25 1 0 2.318717 1.969475 1.375232

---------------------------------------------------------------------

0007caa_Me2PO_SH_dimer_-H+_b3lyp6311++2d2p_PMCdmso.log

Standard orientation:

---------------------------------------------------------------------

Center Atomic Atomic Coordinates (Angstroms)

Number Number Type X Y Z

---------------------------------------------------------------------

1 15 0 -2.491989 0.224743 0.246850

2 6 0 -1.929946 1.610851 -0.780004

3 1 0 -2.337044 2.531490 -0.361822

4 1 0 -0.841620 1.655228 -0.753179

5 1 0 -2.267203 1.492186 -1.807134

6 6 0 -4.287363 0.085640 0.019118

7 1 0 -4.543225 -0.011896 -1.033771

8 1 0 -4.652140 -0.780611 0.567364

9 1 0 -4.750239 0.984547 0.424893

10 8 0 -2.082362 0.368947 1.682602

11 16 0 -1.792458 -1.549558 -0.700380

12 1 0 -0.446111 -1.249359 -0.578276

13 15 0 2.360905 -0.226077 0.031323

14 6 0 4.024459 -0.876433 -0.361880

15 1 0 4.088968 -1.918463 -0.047690

16 1 0 4.177538 -0.817820 -1.438052

17 1 0 4.795372 -0.294819 0.139807

18 6 0 2.250465 -0.373689 1.851047

19 1 0 3.036320 0.203421 2.334273

20 1 0 1.281785 0.002060 2.174992

21 1 0 2.339722 -1.422803 2.134221

22 8 0 1.321402 -1.141832 -0.611208

23 16 0 2.281592 1.746540 -0.478936

---------------------------------------------------------------------

0008aaa_Ph2PS_OH_dimer_-H+_CIRQAY_b3lyp6311++2d2p.log

Standard orientation:

---------------------------------------------------------------------

Center Atomic Atomic Coordinates (Angstroms)

Number Number Type X Y Z

---------------------------------------------------------------------

1 15 0 -2.108334 0.178624 -0.442008

2 8 0 -1.007054 0.053521 0.610251

3 16 0 -1.676060 0.117886 -2.391725

4 1 0 0.343787 0.548934 0.564701

5 15 0 2.564329 0.118230 0.947768

6 8 0 1.308690 0.948136 0.493209

7 16 0 2.967975 -0.069731 2.872819

8 6 0 -3.034105 1.729040 -0.044905

9 6 0 -2.934703 2.264579 1.241078

10 6 0 -3.828830 2.380461 -0.988536

11 6 0 -3.626969 3.423397 1.580033

12 1 0 -2.296042 1.777078 1.964154

13 6 0 -4.526276 3.535409 -0.649693

14 1 0 -3.874362 1.986512 -1.994651

15 6 0 -4.428842 4.059116 0.636860

16 1 0 -3.533518 3.833139 2.577606

17 1 0 -5.137143 4.032793 -1.392344

18 1 0 -4.966008 4.961690 0.899041

19 6 0 -3.327838 -1.139731 -0.012059

20 6 0 -3.258024 -1.748463 1.242354

21 6 0 -4.318669 -1.545632 -0.906861

22 6 0 -4.169942 -2.738119 1.599096

23 1 0 -2.472719 -1.451618 1.922915

24 6 0 -5.234696 -2.528993 -0.549324

25 1 0 -4.349730 -1.101820 -1.892583

26 6 0 -5.163726 -3.127347 0.706445

27 1 0 -4.099328 -3.208659 2.571461

28 1 0 -5.997348 -2.836185 -1.253617

29 1 0 -5.872485 -3.897571 0.982775

30 6 0 3.893560 1.006686 0.041988

31 6 0 3.611955 1.634412 -1.174260

32 6 0 5.193412 1.045799 0.544013

33 6 0 4.620454 2.284349 -1.877586

34 1 0 2.601882 1.625743 -1.557227

35 6 0 6.202637 1.692260 -0.162456

36 1 0 5.398288 0.582815 1.499542

37 6 0 5.918644 2.311719 -1.375751

38 1 0 4.390003 2.772664 -2.815349

39 1 0 7.207596 1.718535 0.238489

40 1 0 6.702289 2.818498 -1.924090

41 6 0 2.437910 -1.507968 0.105552

42 6 0 1.615254 -1.660631 -1.012884

43 6 0 3.174096 -2.600492 0.568606

44 6 0 1.538128 -2.889894 -1.660505

45 1 0 1.006109 -0.841746 -1.367920

46 6 0 3.104676 -3.823511 -0.087826

47 1 0 3.781104 -2.488059 1.456178

48 6 0 2.286286 -3.970123 -1.205346

49 1 0 0.877031 -2.996772 -2.509728

50 1 0 3.677907 -4.664551 0.280457

51 1 0 2.222693 -4.925918 -1.709598

---------------------------------------------------------------------

0008aaa_Ph2PS_OH_dimer_-H+_CIRQAY_b3lyp631d.log

Standard orientation:

---------------------------------------------------------------------

Center Atomic Atomic Coordinates (Angstroms)

Number Number Type X Y Z

---------------------------------------------------------------------

1 15 0 -2.116786 -0.074755 0.463761

2 8 0 -1.014327 0.192430 -0.587530

3 16 0 -1.729757 0.080244 2.417486

4 1 0 0.252437 -0.349648 -0.588046

5 15 0 2.523132 -0.014496 -0.967055

6 8 0 1.220868 -0.810188 -0.549900

7 16 0 2.969840 0.202916 -2.884504

8 6 0 -2.799394 -1.751839 0.081279

9 6 0 -2.494604 -2.338986 -1.154049

10 6 0 -3.614586 -2.447242 0.983665

11 6 0 -3.003697 -3.596514 -1.484100

12 1 0 -1.840652 -1.808628 -1.838722

13 6 0 -4.129758 -3.699925 0.650481

14 1 0 -3.818120 -2.008490 1.956068

15 6 0 -3.826800 -4.276810 -0.585496

16 1 0 -2.751589 -4.046870 -2.440866

17 1 0 -4.759924 -4.231687 1.359341

18 1 0 -4.223165 -5.256288 -0.842099

19 6 0 -3.490816 1.063185 -0.021075

20 6 0 -3.477143 1.638650 -1.298702

21 6 0 -4.546738 1.360017 0.849736

22 6 0 -4.508491 2.489403 -1.700908

23 1 0 -2.641517 1.424790 -1.956993

24 6 0 -5.580554 2.204884 0.444986

25 1 0 -4.535570 0.943799 1.852865

26 6 0 -5.564779 2.770041 -0.832490

27 1 0 -4.484088 2.937299 -2.691312

28 1 0 -6.394537 2.430231 1.129792

29 1 0 -6.367901 3.432797 -1.145754

30 6 0 3.811939 -0.971358 -0.062640

31 6 0 3.469883 -1.664763 1.107321

32 6 0 5.137247 -0.996267 -0.512070

33 6 0 4.444512 -2.366951 1.817250

34 1 0 2.438269 -1.663203 1.442574

35 6 0 6.110937 -1.695663 0.202002

36 1 0 5.388661 -0.481444 -1.434634

37 6 0 5.766817 -2.380827 1.368841

38 1 0 4.168832 -2.906810 2.719370

39 1 0 7.136983 -1.711376 -0.156853

40 1 0 6.524757 -2.928649 1.923371

41 6 0 2.441015 1.601276 -0.089916

42 6 0 1.584956 1.761481 1.009103

43 6 0 3.246510 2.673372 -0.497920

44 6 0 1.541691 2.979780 1.689323

45 1 0 0.927521 0.958024 1.323362

46 6 0 3.208622 3.884329 0.192059

47 1 0 3.882186 2.555001 -1.370261

48 6 0 2.355969 4.039143 1.288079

49 1 0 0.856497 3.093288 2.524285

50 1 0 3.836079 4.710702 -0.132705

51 1 0 2.319552 4.986938 1.819802

---------------------------------------------------------------------

000aaa_5_H2O_+2H2O_b3lyp6311++2d2p_PCMdmso.log

Standard orientation:

---------------------------------------------------------------------

Center Atomic Atomic Coordinates (Angstroms)

Number Number Type X Y Z

---------------------------------------------------------------------

1 8 0 1.696540 2.285504 -0.008309

2 1 0 0.829255 1.979873 0.351621

3 8 0 -0.618972 1.355941 1.087937

4 1 0 -0.528816 0.386859 1.145565

5 8 0 -0.502046 -1.491285 0.985948

6 1 0 0.348803 -1.779994 0.572938

7 8 0 1.854555 -2.177278 -0.150487

8 1 0 2.376463 -1.361668 -0.332748

9 8 0 3.259945 0.121077 -0.613264

10 1 0 2.718045 0.913662 -0.393279

11 8 0 -2.717516 -1.354176 -0.715922

12 1 0 -0.588082 -1.984353 1.807972

13 1 0 -3.453828 -1.876385 -0.383176

14 1 0 1.489921 2.816411 -0.783375

15 1 0 4.059717 0.192381 -0.083485

16 1 0 -1.410787 1.491068 0.530241

17 1 0 -1.971209 -1.520223 -0.104839

18 1 0 1.765856 -2.629952 -0.994771

19 8 0 -2.949552 1.402153 -0.499742

20 1 0 -2.958179 0.433148 -0.652492

21 1 0 -2.860787 1.803682 -1.369457

---------------------------------------------------------------------

000aaa_5_H2O_+2H2O_b3lyp6311++2d2p_PCMw.log

Standard orientation:

---------------------------------------------------------------------

Center Atomic Atomic Coordinates (Angstroms)

Number Number Type X Y Z

---------------------------------------------------------------------

1 8 0 1.693747 2.286515 -0.008463

2 1 0 0.826977 1.979188 0.351264

3 8 0 -0.620175 1.354332 1.089101

4 1 0 -0.529033 0.385136 1.145692

5 8 0 -0.501457 -1.491694 0.985840

6 1 0 0.349926 -1.780298 0.573926

7 8 0 1.856496 -2.176676 -0.149631

8 1 0 2.377412 -1.360678 -0.332847

9 8 0 3.259719 0.123366 -0.613681

10 1 0 2.716941 0.915247 -0.393377

11 8 0 -2.715722 -1.354683 -0.717823

12 1 0 -0.589279 -1.985305 1.807391

13 1 0 -3.451724 -1.877431 -0.385035

14 1 0 1.486099 2.816054 -0.784284

15 1 0 4.059597 0.195144 -0.084031

16 1 0 -1.411780 1.489122 0.530911

17 1 0 -1.969514 -1.520533 -0.106480

18 1 0 1.767525 -2.630306 -0.993421

19 8 0 -2.949617 1.401093 -0.498922

20 1 0 -2.957103 0.432245 -0.653293

21 1 0 -2.859978 1.804396 -1.367790

---------------------------------------------------------------------

000aaa_5_H2O_+3H2O_B3LYP6311++2d2p_PCMdmso.log

Standard orientation:

---------------------------------------------------------------------

Center Atomic Atomic Coordinates (Angstroms)

Number Number Type X Y Z

---------------------------------------------------------------------

1 8 0 2.378612 2.201808 0.009878

2 1 0 1.509566 1.937962 0.399780

3 8 0 0.054763 1.401412 1.170340

4 1 0 0.020593 0.427335 1.165642

5 8 0 0.020253 -1.451923 1.122615

6 1 0 0.821769 -1.753776 0.626834

7 8 0 2.224620 -2.221113 -0.240185

8 1 0 2.772555 -1.439940 -0.487031

9 8 0 3.707367 -0.017780 -0.872424

10 1 0 3.253007 0.797288 -0.555771

11 8 0 -2.401083 -2.166097 -0.052141

12 1 0 0.095342 -1.827202 2.006212

13 1 0 -2.234059 -2.800515 -0.755793

14 1 0 2.174433 2.816338 -0.701385

15 1 0 4.574745 -0.015903 -0.456399

16 1 0 -0.750723 1.703042 0.702230

17 1 0 -1.525560 -1.957999 0.336235

18 1 0 2.033370 -2.682717 -1.062299

19 8 0 -2.252828 2.296884 -0.126688

20 1 0 -2.797557 1.528839 -0.409066

21 1 0 -2.061083 2.789812 -0.930171

22 8 0 -3.732619 0.097789 -0.866813

23 1 0 -4.602447 0.073702 -0.456588

24 1 0 -3.276640 -0.724113 -0.579077

---------------------------------------------------------------------

000aaa_5_H2O_+3H2O_B3LYP6311++2d2p_PCMw.log

Standard orientation:

---------------------------------------------------------------------

Center Atomic Atomic Coordinates (Angstroms)

Number Number Type X Y Z

---------------------------------------------------------------------

1 8 0 2.377651 2.201829 0.010710

2 1 0 1.509187 1.937150 0.401138

3 8 0 0.054830 1.399913 1.173509

4 1 0 0.021270 0.425653 1.168177

5 8 0 0.019820 -1.451308 1.125776

6 1 0 0.820566 -1.754107 0.629365

7 8 0 2.221762 -2.222265 -0.240586

8 1 0 2.769004 -1.441264 -0.489037

9 8 0 3.704133 -0.018159 -0.876174

10 1 0 3.250818 0.796785 -0.557865

11 8 0 -2.400581 -2.164906 -0.051053

12 1 0 0.094715 -1.827246 2.009151

13 1 0 -2.231668 -2.799254 -0.754427

14 1 0 2.172040 2.815565 -0.700932

15 1 0 4.572544 -0.016979 -0.462219

16 1 0 -0.749930 1.701175 0.703795

17 1 0 -1.525709 -1.956920 0.338928

18 1 0 2.026270 -2.682735 -1.062406

19 8 0 -2.249851 2.297383 -0.126035

20 1 0 -2.794057 1.529597 -0.410161

21 1 0 -2.054774 2.790007 -0.928980

22 8 0 -3.728535 0.098835 -0.871002

23 1 0 -4.600078 0.075281 -0.464335

24 1 0 -3.274030 -0.723277 -0.581342

---------------------------------------------------------------------

000baa_5_H2O_+3H2O_-H+_b3lyp6311++2d2p_PCMdmso.log

Standard orientation:

---------------------------------------------------------------------

Center Atomic Atomic Coordinates (Angstroms)

Number Number Type X Y Z

---------------------------------------------------------------------

1 8 0 -2.413247 -2.090901 0.138395

2 1 0 -1.518748 -1.846481 0.493219

3 8 0 -0.035776 -1.373486 1.178917

4 1 0 0.026302 -0.386026 1.191065

5 8 0 0.123967 1.344861 1.231400

6 1 0 -0.567659 1.702439 0.649231

7 8 0 -2.060050 2.326115 -0.397134

8 1 0 -2.651047 1.559444 -0.560425

9 8 0 -3.700622 0.133625 -0.794131

10 1 0 -3.257806 -0.678447 -0.454265

11 8 0 2.462578 1.912287 0.251805

12 1 0 2.453661 2.691885 -0.309815

13 1 0 -2.254585 -2.735026 -0.558056

14 1 0 -4.530442 0.202084 -0.312520

15 1 0 0.719603 -1.679680 0.637012

16 1 0 1.017343 1.602932 0.818123

17 1 0 -1.783472 2.628851 -1.267154

18 8 0 2.162070 -2.229475 -0.342867

19 1 0 2.677060 -1.410015 -0.582694

20 1 0 1.901423 -2.627893 -1.178284

21 8 0 3.496349 -0.000974 -0.947322

22 1 0 4.417397 -0.045655 -0.676862

23 1 0 3.068824 0.845165 -0.441076

---------------------------------------------------------------------

000caa_5_H2O_+3H2O_-H+_b3lyp6311++2d2p_PCMdmso.log

Standard orientation:

---------------------------------------------------------------------

Center Atomic Atomic Coordinates (Angstroms)

Number Number Type X Y Z

---------------------------------------------------------------------

1 8 0 1.945049 2.405949 -0.406180

2 1 0 1.203335 2.010989 0.121561

3 8 0 0.008792 1.309271 1.115024

4 1 0 0.051222 0.302869 1.099002

5 8 0 0.157148 -1.321351 1.039672

6 1 0 1.553639 -1.779185 0.459167

7 8 0 2.465507 -2.036139 0.087018

8 1 0 3.352264 -0.523882 -0.464337

9 8 0 3.837759 0.283270 -0.726440

10 1 0 3.194288 1.008647 -0.632348

11 8 0 -1.811011 -2.218648 -0.326138

12 1 0 0.082650 -1.672913 1.931512

13 1 0 -1.443619 -2.649092 -1.103094

14 1 0 1.561408 2.640888 -1.256058

15 1 0 -0.889471 1.550970 0.826948

16 1 0 -1.008939 -1.873443 0.222618

17 1 0 2.294159 -2.654976 -0.628150

18 8 0 -2.641086 2.021566 0.271566

19 1 0 -3.007929 1.219574 -0.163959

20 1 0 -2.625861 2.701527 -0.408494

21 8 0 -3.581046 -0.281559 -0.899594

22 1 0 -4.427449 -0.570252 -0.545793

23 1 0 -2.938599 -1.010589 -0.697992

---------------------------------------------------------------------

000daa_5_H2O_+3H2O_-H+_b3lyp6311++2d2p_PCMdmso.log

Standard orientation:

---------------------------------------------------------------------

Center Atomic Atomic Coordinates (Angstroms)

Number Number Type X Y Z

---------------------------------------------------------------------

1 8 0 -0.442364 -0.913054 -1.669603

2 1 0 -0.509220 0.059448 -1.633521

3 8 0 -0.898192 1.863248 -0.997929

4 1 0 -0.277038 1.850655 -0.241558

5 8 0 0.895292 1.618658 1.185934

6 1 0 1.758513 1.495847 0.749233

7 8 0 3.263814 0.911757 -0.250032

8 1 0 2.912728 0.013256 -0.427464

9 8 0 1.950488 -1.498980 -0.628183

10 1 0 1.087545 -1.310456 -1.091866

11 8 0 0.303888 -1.054648 1.813513

12 1 0 0.968115 -1.401618 1.200347

13 1 0 -1.040096 -1.202115 -0.908793

14 1 0 2.349977 -2.250055 -1.076625

15 1 0 -1.757540 1.586797 -0.616803

16 1 0 0.648334 0.713895 1.479807

17 1 0 4.051181 0.783010 0.287459

18 8 0 -3.227790 0.795811 0.166433

19 1 0 -2.790739 -0.118569 0.287327

20 1 0 -3.940066 0.669140 -0.466584

21 8 0 -1.907609 -1.401632 0.449637

22 1 0 -2.388457 -2.226045 0.555074

23 1 0 -0.573459 -1.232475 1.345800

---------------------------------------------------------------------

0010aaa_Me2PO_S-_b3lyp6311++2d2p_PMCdmso.log

Standard orientation:

---------------------------------------------------------------------

Center Atomic Atomic Coordinates (Angstroms)

Number Number Type X Y Z

---------------------------------------------------------------------

1 15 0 0.261562 0.000031 0.176348

2 6 0 0.972170 -1.438764 -0.707065

3 1 0 2.057850 -1.422729 -0.605198

4 1 0 0.586610 -2.351828 -0.256459

5 1 0 0.704746 -1.422137 -1.761841

6 6 0 0.972969 1.437817 -0.708065

7 1 0 0.703980 1.422030 -1.762418

8 1 0 0.589589 2.351265 -0.256348

9 1 0 2.058819 1.420241 -0.607847

10 8 0 0.743955 0.000576 1.615701

11 16 0 -1.765469 0.000236 -0.114372

---------------------------------------------------------------------

0010aaa_SORKOB_b3lyp6311++2p2d.log

Standard orientation:

---------------------------------------------------------------------

Center Atomic Atomic Coordinates (Angstroms)

Number Number Type X Y Z

---------------------------------------------------------------------

1 7 0 -0.305728 -1.385883 -0.916493

2 1 0 0.757348 1.412548 -1.181015

3 1 0 -0.733910 -1.880401 -1.688309

4 6 0 -0.952764 -1.775849 0.334796

5 1 0 -0.550133 -1.183893 1.156229

6 1 0 -0.817975 -2.837712 0.588688

7 15 0 -2.746929 -1.486315 0.190002

8 8 0 -3.338975 -2.013815 1.609715

9 1 0 -3.783770 -2.861670 1.498124

10 8 0 -3.342240 -2.150798 -0.996701

11 6 0 -3.013109 0.303759 0.297018

12 1 0 -2.633058 0.658236 1.255281

13 1 0 -2.396204 0.754817 -0.479339

14 6 0 -4.477840 0.684945 0.099316

15 1 0 -4.885579 0.201881 -0.792039

16 1 0 -5.098800 0.352080 0.930955

17 6 0 -4.666446 2.173064 -0.072686

18 8 0 -5.977168 2.512525 -0.033364

19 1 0 -6.026247 3.468994 -0.173921

20 8 0 -3.792176 2.984026 -0.242072

21 6 0 1.145384 -1.567922 -0.931198

22 1 0 1.487612 -1.632407 -1.963895

23 1 0 1.480110 -2.471861 -0.404916

24 15 0 1.944867 -0.099018 -0.170279

25 8 0 1.477240 0.166134 1.212254

26 8 0 1.666719 1.094781 -1.232600

27 6 0 3.738086 -0.300486 -0.365240

28 1 0 4.008800 -1.247970 0.101660

29 1 0 3.974290 -0.385628 -1.425750

30 6 0 4.514912 0.844741 0.281803

31 1 0 4.311711 1.795649 -0.211832

32 1 0 4.213695 0.980032 1.322456

33 6 0 6.005816 0.610176 0.257696

34 8 0 6.680763 1.674959 0.751334

35 1 0 7.622658 1.454364 0.718108

36 8 0 6.560366 -0.384117 -0.136054

---------------------------------------------------------------------

0010baa_SORKOB_kismodell_b3lyp6311++2p2d.log

Standard orientation:

---------------------------------------------------------------------

Center Atomic Atomic Coordinates (Angstroms)

Number Number Type X Y Z

---------------------------------------------------------------------

1 1 0 0.000370 -1.905978 -1.045119

2 6 0 1.453063 0.964192 -0.073947

3 1 0 1.435446 1.474791 -1.035408

4 1 0 1.480272 1.697125 0.730809

5 15 0 0.000043 -0.097065 0.124190

6 8 0 0.000597 -0.938440 1.343010

7 8 0 -0.000572 -0.965515 -1.255953

8 6 0 -1.453195 0.964057 -0.073080

9 1 0 -1.480770 1.696171 0.732382

10 1 0 -1.435341 1.475603 -1.034052

11 1 0 2.342968 0.340391 -0.012794

12 1 0 -2.342995 0.340015 -0.012961

---------------------------------------------------------------------

0010bba_SORKOB_kismodell_H+_b3lyp6311++2p2d.log

Standard orientation:

---------------------------------------------------------------------

Center Atomic Atomic Coordinates (Angstroms)

Number Number Type X Y Z

---------------------------------------------------------------------

1 6 0 1.443854 -0.949914 -0.000087

2 1 0 1.442178 -1.577053 0.893107

3 1 0 1.442744 -1.576326 -0.893761

4 15 0 0.000026 0.218426 0.000021

5 8 0 0.000258 0.945122 -1.322096

6 8 0 -0.000053 0.944485 1.322494

7 6 0 -1.444071 -0.949665 -0.000336

8 1 0 -1.442793 -1.576394 -0.893777

9 1 0 -1.442758 -1.576478 0.893097

10 1 0 2.351543 -0.344973 0.000521

11 1 0 -2.351637 -0.344546 -0.000148

---------------------------------------------------------------------

0013aaa_Me2PO_SH_+H+_b3lyp6311++2d2p_PMCdmso.log

Standard orientation:

---------------------------------------------------------------------

Center Atomic Atomic Coordinates (Angstroms)

Number Number Type X Y Z

---------------------------------------------------------------------

1 15 0 0.320940 0.006257 0.039562

2 6 0 1.086273 -1.336271 -0.861666

3 1 0 2.165036 -1.257868 -0.734920

4 1 0 0.736209 -2.286673 -0.465773

5 1 0 0.825550 -1.251715 -1.913443

6 6 0 0.839786 1.613163 -0.559021

7 1 0 0.558354 1.716455 -1.604964

8 1 0 0.368590 2.396602 0.030255

9 1 0 1.921779 1.676232 -0.457574

10 8 0 0.821281 -0.238486 1.530922

11 16 0 -1.758376 0.003698 -0.102631

12 1 0 -1.878030 -1.282699 0.274319

13 1 0 0.495823 0.383179 2.197507

---------------------------------------------------------------------

001aaa_5_H2O_+3H2O_+H+_b3lyp6311++2d2p_PCMdmso.log

Standard orientation:

---------------------------------------------------------------------

Center Atomic Atomic Coordinates (Angstroms)

Number Number Type X Y Z

---------------------------------------------------------------------

1 8 0 -2.412251 -2.087390 0.156509

2 1 0 -0.908193 -1.585407 0.681521

3 8 0 -0.025396 -1.265713 1.017803

4 1 0 -0.007599 -0.245779 1.034133

5 8 0 0.071806 1.304579 1.080237

6 1 0 -0.684692 1.718605 0.573804

7 8 0 -1.956654 2.347811 -0.254775

8 1 0 -2.589381 1.642162 -0.519191

9 8 0 -3.656410 0.305829 -0.917164

10 1 0 -3.325954 -0.526007 -0.538060

11 8 0 2.635251 2.020468 0.051350

12 1 0 0.006410 1.630162 1.985596

13 1 0 2.549834 2.694100 -0.630671

14 1 0 -2.355862 -2.757187 -0.536608

15 1 0 -4.555441 0.405950 -0.587976

16 1 0 0.759819 -1.648584 0.427676

17 1 0 1.731104 1.849093 0.373980

18 1 0 -1.710122 2.806968 -1.063830

19 8 0 1.870441 -2.202859 -0.303041

20 1 0 2.575704 -1.524379 -0.492598

21 1 0 1.608507 -2.575928 -1.151616

22 8 0 3.712837 -0.350794 -0.784067

23 1 0 4.538409 -0.490297 -0.309671

24 1 0 3.371437 0.524659 -0.490948

25 1 0 -2.920972 -2.493578 0.869645

---------------------------------------------------------------------

001aaa_5_H2O_+3H2O_+H+_b3lyp6311++2d2p_PCMw.log

Standard orientation:

---------------------------------------------------------------------

Center Atomic Atomic Coordinates (Angstroms)

Number Number Type X Y Z

---------------------------------------------------------------------

1 8 0 -2.410460 -2.086977 0.151486

2 1 0 -0.907931 -1.585506 0.676886

3 8 0 -0.024682 -1.266494 1.013286

4 1 0 -0.007166 -0.246612 1.030525

5 8 0 0.070989 1.303944 1.077664

6 1 0 -0.683625 1.716763 0.567617

7 8 0 -1.950985 2.346386 -0.269895

8 1 0 -2.589415 1.640799 -0.520626

9 8 0 -3.670027 0.308337 -0.895474

10 1 0 -3.330829 -0.523720 -0.524375

11 8 0 2.633632 2.021535 0.050782

12 1 0 0.000996 1.629495 1.982675

13 1 0 2.543378 2.685205 -0.640370

14 1 0 -2.352746 -2.750845 -0.547240

15 1 0 -4.558756 0.411091 -0.540117

16 1 0 0.758895 -1.647635 0.420840

17 1 0 1.730122 1.846774 0.373732

18 1 0 -1.696472 2.783461 -1.088701

19 8 0 1.868384 -2.201355 -0.315109

20 1 0 2.577134 -1.524033 -0.494338

21 1 0 1.603344 -2.558626 -1.169540

22 8 0 3.722551 -0.351312 -0.766984

23 1 0 4.538246 -0.492084 -0.276129

24 1 0 3.375920 0.523868 -0.479098

25 1 0 -2.916308 -2.500913 0.862203

---------------------------------------------------------------------

002aab_5_H2O_+3H2O_-H+_b3lyp6311++2d2p_PCMw.log

Standard orientation:

---------------------------------------------------------------------

Center Atomic Atomic Coordinates (Angstroms)

Number Number Type X Y Z

---------------------------------------------------------------------

1 8 0 -2.472875 2.303931 -0.153793

2 1 0 -1.575219 1.937155 0.052521

3 8 0 -0.110201 1.151338 0.408657

4 1 0 -0.073762 0.230733 -0.002164

5 8 0 -0.056040 -1.280895 -0.580847

6 1 0 -1.435569 -1.862357 -0.052820

7 8 0 -2.342050 -2.195990 0.263712

8 1 0 -3.506090 -0.780600 0.058924

9 8 0 -4.129854 -0.042207 -0.087888

10 1 0 -3.579448 0.761296 -0.097827

11 8 0 2.283898 -2.136296 0.019008

12 1 0 -0.113014 -1.252782 -1.540421

13 1 0 2.212686 -2.629786 0.840870

14 1 0 -2.683888 2.898350 0.572037

15 1 0 0.743645 1.574428 0.211720

16 1 0 1.333441 -1.817400 -0.214094

17 1 0 -2.226453 -2.443041 1.185508

18 8 0 2.484904 2.252493 -0.146873

19 1 0 3.056556 1.459472 -0.040928

20 1 0 2.777460 2.874630 0.525822

21 8 0 3.976113 -0.045202 0.146092

22 1 0 4.629493 -0.179109 -0.546804

23 1 0 3.369002 -0.828359 0.103127

---------------------------------------------------------------------

0101aaa_MePhPO_SH_b3lyp6311++2d2p_PMCdmso.log

Standard orientation:

---------------------------------------------------------------------

Center Atomic Atomic Coordinates (Angstroms)

Number Number Type X Y Z

---------------------------------------------------------------------

1 15 0 1.201280 -0.446777 -0.186000

2 6 0 1.755564 0.013952 -1.848598

3 1 0 1.469135 1.032805 -2.098305

4 1 0 2.837943 -0.086995 -1.899826

5 1 0 1.295343 -0.676957 -2.553369

6 8 0 1.543810 -1.844891 0.215278

7 16 0 2.175237 1.063472 0.994410

8 1 0 1.599002 0.665493 2.140974

9 6 0 -0.583052 -0.121776 -0.072044

10 6 0 -1.412615 -1.155352 0.367030

11 6 0 -1.139834 1.111218 -0.424876

12 6 0 -2.787763 -0.957550 0.452079

13 1 0 -0.978755 -2.106804 0.637697

14 6 0 -2.513230 1.302684 -0.344390

15 1 0 -0.509535 1.925319 -0.754674

16 6 0 -3.338317 0.269110 0.095750

17 1 0 -3.425254 -1.760787 0.794350

18 1 0 -2.939225 2.257083 -0.620373

19 1 0 -4.406629 0.422351 0.161027

---------------------------------------------------------------------

0105aaa_MePhPO_SH_b3lyp6311++2d2p_PMCdmso_f.log

Standard orientation:

---------------------------------------------------------------------

Center Atomic Atomic Coordinates (Angstroms)

Number Number Type X Y Z

---------------------------------------------------------------------

1 15 0 1.229521 0.255908 0.011405

2 6 0 1.631834 1.205281 1.497722

3 1 0 1.378451 0.613179 2.373773

4 1 0 2.698403 1.419085 1.498105

5 1 0 1.067198 2.135845 1.508613

6 8 0 1.530918 1.394029 -1.113652

7 16 0 2.246834 -1.420082 -0.218699

8 6 0 -0.577390 0.036999 -0.010722

9 6 0 -1.404160 1.151438 -0.194210

10 6 0 -1.149680 -1.221305 0.178876

11 6 0 -2.785828 1.002889 -0.186527

12 1 0 -0.974800 2.130558 -0.352846

13 6 0 -2.533371 -1.365512 0.189499

14 1 0 -0.511477 -2.083128 0.310286

15 6 0 -3.351789 -0.255023 0.007463

16 1 0 -3.418867 1.866747 -0.333662

17 1 0 -2.969537 -2.343665 0.336419

18 1 0 -4.427037 -0.368412 0.012875

19 1 0 1.540451 1.031650 -2.008857

---------------------------------------------------------------------

0110aaa_MePhPO_S-_b3lyp6311++2d2p_PMCdmso.log

Standard orientation:

---------------------------------------------------------------------

Center Atomic Atomic Coordinates (Angstroms)

Number Number Type X Y Z

---------------------------------------------------------------------

1 15 0 1.271044 -0.380626 -0.057361

2 6 0 1.652883 -0.331836 -1.849257

3 1 0 1.365163 0.621816 -2.286772

4 1 0 2.725226 -0.473700 -1.976510

5 1 0 1.120411 -1.139619 -2.351546

6 8 0 1.561112 -1.765160 0.485011

7 16 0 2.214970 1.189734 0.843123

8 6 0 -0.549142 -0.092059 -0.006158

9 6 0 -1.388006 -1.137131 0.385279

10 6 0 -1.120964 1.132769 -0.363709

11 6 0 -2.770273 -0.963155 0.423126

12 1 0 -0.950200 -2.085376 0.663267

13 6 0 -2.500354 1.306523 -0.335328

14 1 0 -0.485708 1.958632 -0.654004

15 6 0 -3.329306 0.258078 0.060910

16 1 0 -3.407300 -1.780450 0.734003

17 1 0 -2.928858 2.259374 -0.615761

18 1 0 -4.401836 0.395118 0.088506

---------------------------------------------------------------------

0113aaa_MePhPO_SH_+H+_b3lyp6311++2d2p_PMCdmso.log

Standard orientation:

---------------------------------------------------------------------

Center Atomic Atomic Coordinates (Angstroms)

Number Number Type X Y Z

---------------------------------------------------------------------

1 15 0 1.155952 -0.268904 -0.237916

2 6 0 1.766186 0.195225 -1.860165

3 1 0 1.495961 1.226644 -2.075123

4 1 0 2.848752 0.085866 -1.886760

5 1 0 1.306579 -0.469179 -2.589500

6 8 0 1.390378 -1.818533 0.028736

7 16 0 2.218322 0.927238 1.103278

8 6 0 -0.614711 -0.085927 -0.083024

9 6 0 -1.406106 -1.165038 0.321897

10 6 0 -1.195950 1.152890 -0.377247

11 6 0 -2.781749 -0.998859 0.424849

12 1 0 -0.957465 -2.118892 0.550611

13 6 0 -2.571008 1.303621 -0.273778

14 1 0 -0.590496 1.995278 -0.680622

15 6 0 -3.362691 0.229730 0.127312

16 1 0 -3.396429 -1.830819 0.736580

17 1 0 -3.022830 2.257432 -0.503887

18 1 0 -4.433438 0.352576 0.208375

19 1 0 2.314177 -2.100235 0.084652

20 1 0 1.475900 0.557487 2.163030

---------------------------------------------------------------------

0201aaa_Ph2PO_SH_b3lyp6311++2d2p_PMCdmso.log

Standard orientation:

---------------------------------------------------------------------

Center Atomic Atomic Coordinates (Angstroms)

Number Number Type X Y Z

---------------------------------------------------------------------

1 15 0 0.028984 0.988514 0.451327

2 8 0 0.072754 1.611306 1.808245

3 16 0 0.213028 2.383512 -1.165739

4 1 0 -0.911627 3.054643 -0.859419

5 6 0 -1.501065 0.042278 0.178868

6 6 0 -2.092732 -0.535296 1.308226

7 6 0 -2.081841 -0.146824 -1.077182

8 6 0 -3.247283 -1.297789 1.177191

9 1 0 -1.654394 -0.380927 2.283559

10 6 0 -3.237458 -0.911101 -1.202652

11 1 0 -1.644629 0.309852 -1.952974

12 6 0 -3.819782 -1.487665 -0.077897

13 1 0 -3.700718 -1.738862 2.053832

14 1 0 -3.684030 -1.049890 -2.177232

15 1 0 -4.719811 -2.078385 -0.177767

16 6 0 1.456342 -0.089387 0.125833

17 6 0 2.542756 -0.008871 1.000016

18 6 0 1.497243 -0.977708 -0.952566

19 6 0 3.663006 -0.807467 0.793478

20 1 0 2.503535 0.672070 1.837847

21 6 0 2.619309 -1.771906 -1.155984

22 1 0 0.659590 -1.060751 -1.630352

23 6 0 3.702625 -1.686951 -0.284202

24 1 0 4.500738 -0.743385 1.473731

25 1 0 2.646148 -2.458652 -1.990332

26 1 0 4.573236 -2.307938 -0.443704

---------------------------------------------------------------------

0205aaa_Ph2PO_SH_b3lyp6311++2d2p_PMCdmso.log

Standard orientation:

---------------------------------------------------------------------

Center Atomic Atomic Coordinates (Angstroms)

Number Number Type X Y Z

---------------------------------------------------------------------

1 15 0 -0.030308 1.036470 0.261146

2 8 0 -0.187848 1.372069 1.844094

3 16 0 -0.014577 2.634393 -0.898623

4 6 0 -1.450364 -0.069171 0.030937

5 6 0 -2.619674 0.115964 0.773403

6 6 0 -1.403900 -1.062550 -0.950489

7 6 0 -3.727768 -0.690136 0.536949

8 1 0 -2.662949 0.880521 1.534703

9 6 0 -2.515321 -1.863663 -1.184944

10 1 0 -0.504288 -1.217844 -1.529653

11 6 0 -3.677985 -1.678959 -0.441618

12 1 0 -4.627645 -0.546379 1.118534

13 1 0 -2.471208 -2.632629 -1.943352

14 1 0 -4.540674 -2.304965 -0.622682

15 6 0 1.469670 0.015711 0.138917

16 6 0 1.691533 -0.986734 1.090486

17 6 0 2.394989 0.212955 -0.885653

18 6 0 2.829513 -1.779034 1.013110

19 1 0 0.983478 -1.145557 1.891607

20 6 0 3.532270 -0.585534 -0.961893

21 1 0 2.225012 0.991632 -1.615029

22 6 0 3.749960 -1.580353 -0.014299

23 1 0 2.998691 -2.548994 1.752746

24 1 0 4.245684 -0.428315 -1.758638

25 1 0 4.634538 -2.199291 -0.073161

26 1 0 0.272472 2.186944 2.083531

---------------------------------------------------------------------

0210aaa_Ph2PO_S-_b3lyp6311++2d2p_PMCdmso.log

Standard orientation:

---------------------------------------------------------------------

Center Atomic Atomic Coordinates (Angstroms)

Number Number Type X Y Z

---------------------------------------------------------------------

1 15 0 -0.000263 1.095694 0.535901

2 8 0 -0.001345 1.338482 2.029322

3 16 0 -0.000174 2.713345 -0.694646

4 6 0 -1.443219 0.022140 0.119882

5 6 0 -2.084128 -0.665253 1.153805

6 6 0 -1.905554 -0.145645 -1.188023

7 6 0 -3.164272 -1.503276 0.887039

8 1 0 -1.738241 -0.532389 2.168946

9 6 0 -2.979871 -0.987350 -1.457760

10 1 0 -1.431161 0.394294 -1.995526

11 6 0 -3.612759 -1.668586 -0.419952

12 1 0 -3.654624 -2.023809 1.698817

13 1 0 -3.327167 -1.107062 -2.475246

14 1 0 -4.451159 -2.319112 -0.629146

15 6 0 1.443535 0.022468 0.121999

16 6 0 2.074257 -0.675289 1.155370

17 6 0 1.916241 -0.135335 -1.183356

18 6 0 3.154339 -1.513841 0.890362

19 1 0 1.720702 -0.549817 2.168825

20 6 0 2.990694 -0.977511 -1.451411

21 1 0 1.449890 0.412999 -1.989863

22 6 0 3.613177 -1.669204 -0.414317

23 1 0 3.636789 -2.042418 1.701675

24 1 0 3.346169 -1.089310 -2.466971

25 1 0 4.451667 -2.320069 -0.622094

---------------------------------------------------------------------

0301aaa_Me2PO_SH_MeOH_b3lyp6311++2d2p_PCMDMSO_SCAN_HSvege.log

Standard orientation:

---------------------------------------------------------------------

Center Atomic Atomic Coordinates (Angstroms)

Number Number Type X Y Z

---------------------------------------------------------------------

1 15 0 -1.002018 -0.144529 0.015352

2 6 0 -1.986388 -0.585942 1.466679

3 1 0 -2.335008 -1.613397 1.370481

4 1 0 -1.366315 -0.490615 2.354989

5 1 0 -2.839356 0.084550 1.545662

6 6 0 -2.069283 -0.397003 -1.425592

7 1 0 -2.911307 0.290498 -1.382550

8 1 0 -1.492720 -0.205514 -2.327835

9 1 0 -2.432384 -1.423900 -1.433832

10 8 0 0.090344 -1.322244 -0.064719

11 16 0 -0.206768 1.683987 0.098269

12 1 0 2.029738 0.694558 -0.418401

13 8 0 2.437353 -0.173921 -0.571921

14 1 0 1.008830 -0.988149 -0.255535

15 6 0 3.548127 -0.342623 0.325771

16 1 0 3.940225 -1.341887 0.159804

17 1 0 4.327223 0.388119 0.111278

18 1 0 3.233326 -0.247390 1.365340

---------------------------------------------------------------------

0301aaa_Me2PO_SH_MeOH_b3lyp6311++2d2p_PMCdmso.log

Standard orientation:

---------------------------------------------------------------------

Center Atomic Atomic Coordinates (Angstroms)

Number Number Type X Y Z

---------------------------------------------------------------------

1 15 0 -0.980228 -0.314989 -0.085459

2 6 0 -1.732639 -0.826442 1.479848

3 1 0 -2.153711 -1.823041 1.348571

4 1 0 -0.963560 -0.858002 2.248575

5 1 0 -2.515673 -0.131634 1.775297

6 6 0 -2.313609 -0.133274 -1.292002

7 1 0 -3.037925 0.607121 -0.956865

8 1 0 -1.890921 0.170493 -2.246768

9 1 0 -2.807937 -1.097783 -1.402598

10 8 0 0.127437 -1.235353 -0.521100

11 16 0 -0.284485 1.694462 0.185005

12 1 0 0.927658 1.261916 0.596754

13 8 0 2.542847 -0.362315 0.556355

14 1 0 1.774230 -0.785316 0.129050

15 6 0 3.555725 -0.153254 -0.426002

16 1 0 3.199821 0.475970 -1.245956

17 1 0 4.387306 0.351351 0.061707

18 1 0 3.916766 -1.098470 -0.839069

---------------------------------------------------------------------

0302aaa_Me2PO_SH_MeOH_b3lyp6311++2d2p_PCMdmso_TS_HS.log

Standard orientation:

---------------------------------------------------------------------

Center Atomic Atomic Coordinates (Angstroms)

Number Number Type X Y Z

---------------------------------------------------------------------

1 15 0 -0.943712 -0.233986 -0.029381

2 6 0 -1.722480 -0.688130 1.543699

3 1 0 -2.304011 -1.598550 1.400608

4 1 0 -0.945254 -0.866008 2.283597

5 1 0 -2.375042 0.111486 1.888746

6 6 0 -2.302539 0.061389 -1.192719

7 1 0 -2.946038 0.859969 -0.828257

8 1 0 -1.885938 0.343383 -2.157163

9 1 0 -2.882385 -0.855101 -1.300124

10 8 0 -0.016460 -1.338952 -0.527474

11 16 0 0.091369 1.563568 0.241090

12 1 0 1.422478 0.786590 -0.243628

13 8 0 2.212039 -0.099163 -0.659335

14 1 0 1.478768 -0.797687 -0.679280

15 6 0 3.217791 -0.443586 0.323471

16 1 0 3.709713 -1.361216 0.013446

17 1 0 3.935969 0.369409 0.348441

18 1 0 2.764240 -0.572686 1.304664

---------------------------------------------------------------------

0303aaa_Me2PS_OH_MeOH_b3lyp6311++2d2p_PMCdmso.log

Standard orientation:

---------------------------------------------------------------------

Center Atomic Atomic Coordinates (Angstroms)

Number Number Type X Y Z

---------------------------------------------------------------------

1 15 0 -1.001924 -0.144772 -0.015326

2 6 0 -2.068221 -0.397710 1.426257

3 1 0 -2.430506 -1.424902 1.435229

4 1 0 -1.491208 -0.205341 2.328069

5 1 0 -2.910836 0.289129 1.383569

6 6 0 -1.986578 -0.586331 -1.466405

7 1 0 -2.839320 0.084471 -1.545554

8 1 0 -1.366375 -0.491165 -2.354689

9 1 0 -2.335538 -1.613692 -1.370295

10 8 0 0.091052 -1.321904 0.063850

11 16 0 -0.207788 1.684232 -0.098430

12 1 0 2.030295 0.695366 0.418231

13 8 0 2.437620 -0.173136 0.572163

14 1 0 1.009116 -0.987414 0.256240

15 6 0 3.547906 -0.342688 -0.325994

16 1 0 3.231935 -0.251526 -1.365607

17 1 0 4.325781 0.390292 -0.114642

18 1 0 3.942115 -1.340650 -0.157051

---------------------------------------------------------------------
